# Supplementary material for: Identification of Molecules Responsible for Therapeutic Effects of Extracellular Vesicles Produced from iPSC-Derived MSCs on Sjo¨gren’s Syndrome
Source: PubMed Central journal article supplement (PMC8407887; doi:10.14336/ad.2021.0621), 2021-09-01
Supplement: AD-12-6-1409-s.pdf [file AD-12-6-1409-s.pdf]

SUPPLEMENTARY DATA

## **Identification of Molecules Responsible for Therapeutic Effects of Extracellular Vesicles Produced from iPSC-Derived MSCs on Sjögren's Syndrome**

**Hyemee Kim<sup>1#</sup>, Qingguo Zhao<sup>1#</sup>, Heather Barreda<sup>1</sup>, Gagandeep Kaur<sup>1</sup>, Bo Hai<sup>1</sup>, Jong Min Choi<sup>2</sup>,  
Sung Youn Jung<sup>2</sup>, Fei Liu<sup>1,\*</sup>, Ryang Hwa Lee<sup>1,\*</sup>**

# SUPPLEMENTARY DATA

**Supplementary Table 1.** A list of proteins found in P5 EVs and P15 EVs.

| Symbol    | P5 EVs |                     |                   | P15 EVs |        |      |
|-----------|--------|---------------------|-------------------|---------|--------|------|
|           | SRA*   | usPept <sup>#</sup> | iFOT <sup>†</sup> | SRA     | usPept | iFOT |
| EIF5A     | S      | 2                   | 946               | S       | 1      | 30.5 |
| NPM1      | S      | 2                   | 230               | S       | 1      | 8.3  |
| PPA1      | S      | 2                   | 70.8              | S       | 1      | 2.9  |
| HSPG2     | S      | 9                   | 13.1              | S       | 1      | 0.62 |
| ITIH3     | S      | 2                   | 22.3              | R       | 0      | 1.3  |
| C3        | S      | 1                   | 1.4               | S       | 1      | 0.09 |
| NME2      | S      | 1                   | 346               | S       | 1      | 31.7 |
| LOXL2     | S      | 0                   | 0.34              | R       | 0      | 0.05 |
| RPLP0     | S      | 3                   | 98.9              | S       | 1      | 15   |
| FERMT2    | S      | 2                   | 35.3              | S       | 1      | 6.1  |
| UBE2V1    | S      | 0                   | 12.7              | S       | 0      | 2.9  |
| UBE2V2    | S      | 0                   | 14                | S       | 0      | 3.2  |
| PAIP2     | S      | 1                   | 77.3              | S       | 1      | 19.2 |
| MMP12     | S      | 1                   | 5.8               | S       | 1      | 1.5  |
| EEF2      | S      | 4                   | 279               | S       | 2      | 72.6 |
| CPE       | S      | 1                   | 15.2              | S       | 2      | 4    |
| COL12A1   | S      | 13                  | 8.7               | S       | 2      | 2.3  |
| DSP       | S      | 2                   | 9.3               | S       | 2      | 2.6  |
| DCTN1     | S      | 1                   | 8.8               | S       | 1      | 2.5  |
| DYNC1H1   | S      | 5                   | 8.4               | S       | 2      | 2.4  |
| RAP1A     | S      | 2                   | 313               | S       | 1      | 96.9 |
| POSTN     | S      | 1                   | 2.8               | R       | 0      | 0.91 |
| KRT14     | S      | 1                   | 61.7              | S       | 1      | 20.1 |
| TGFB1     | S      | 1                   | 259               | S       | 1      | 87.4 |
| KARS      | S      | 1                   | 7.2               | R       | 0      | 2.5  |
| HIST1H2BP | S      | 0                   | 56.4              | S       | 0      | 19.6 |
| HIST1H2BQ | S      | 0                   | 56.4              | S       | 0      | 19.6 |
| HIST1H2BR | S      | 0                   | 56.4              | S       | 0      | 19.6 |
| HIST3H2BA | S      | 0                   | 64.4              | S       | 0      | 22.4 |
| HIST2H2BE | S      | 0                   | 64.4              | S       | 0      | 22.4 |
| HIST1H2BC | S      | 0                   | 64.4              | S       | 0      | 22.4 |
| HIST1H2BB | S      | 0                   | 64.4              | S       | 0      | 22.4 |
| HIST1H2BF | S      | 0                   | 64.4              | S       | 0      | 22.4 |
| HIST1H2BG | S      | 0                   | 64.4              | S       | 0      | 22.4 |
| HIST1H2BH | S      | 0                   | 64.4              | S       | 0      | 22.4 |
| HIST1H2BJ | S      | 0                   | 64.4              | S       | 0      | 22.4 |
| HIST1H2BK | S      | 0                   | 64.4              | S       | 0      | 22.4 |
| HIST1H2BL | S      | 0                   | 64.4              | S       | 0      | 22.4 |
| HIST1H2BM | S      | 0                   | 64.4              | S       | 0      | 22.4 |
| HIST1H2BN | S      | 0                   | 64.4              | S       | 0      | 22.4 |
| FBN1      | S      | 9                   | 22.6              | S       | 4      | 8.7  |
| YWHAZ     | S      | 4                   | 5256              | S       | 1      | 2105 |
| HSPA8     | S      | 3                   | 13.8              | S       | 1      | 6.3  |
| HSP90AA1  | S      | 5                   | 41.5              | S       | 2      | 19.6 |
| PLOD1     | S      | 6                   | 381               | S       | 4      | 185  |
| SPARC     | S      | 4                   | 16351             | S       | 3      | 8718 |
| SMS       | S      | 3                   | 231               | S       | 2      | 125  |
| EXT2      | S      | 1                   | 2.4               | S       | 1      | 1.4  |

# SUPPLEMENTARY DATA

|           |   |    |       |   |    |       |
|-----------|---|----|-------|---|----|-------|
| KRT5      | S | 1  | 66.6  | S | 0  | 39.1  |
| ATP6V1A   | S | 2  | 4.5   | A | 0  | 2.7   |
| COL6A2    | S | 3  | 25.2  | S | 2  | 16.6  |
| LAMA2     | S | 4  | 27.3  | S | 3  | 19    |
| BGN       | S | 13 | 22428 | S | 13 | 16649 |
| VCL       | S | 4  | 63.3  | S | 1  | 47.4  |
| SEPHS1    | S | 3  | 107   | S | 2  | 82.5  |
| ENO1      | S | 0  | 55.9  | S | 0  | 43.7  |
| ENO1B     | S | 0  | 55.9  | S | 0  | 43.7  |
| LAMA4     | S | 6  | 63.6  | S | 3  | 50.1  |
| USP14     | S | 2  | 47.9  | S | 1  | 37.9  |
| TFG       | S | 2  | 60    | S | 1  | 47.6  |
| COL5A1    | S | 5  | 153   | S | 3  | 123   |
| NF2       | S | 1  | 13.5  | S | 1  | 11.1  |
| GNB1      | S | 2  | 89.1  | S | 0  | 74.9  |
| SERPINE1  | S | 1  | 73.5  | S | 1  | 61.9  |
| CDH11     | S | 0  | 7.2   | S | 0  | 6.1   |
| CLTC      | S | 12 | 36.5  | S | 4  | 31    |
| FN1       | S | 41 | 1180  | S | 28 | 1051  |
| ECE1      | R | 0  | 3.3   | S | 1  | 3     |
| RAN       | S | 1  | 158   | S | 1  | 148   |
| TTYH3     | S | 1  | 3.2   | S | 1  | 3     |
| TARDBP    | S | 1  | 94.4  | S | 1  | 92.7  |
| OLFML2B   | S | 5  | 72.2  | S | 2  | 75.9  |
| GSN       | S | 4  | 311   | S | 2  | 332   |
| IGFBP7    | S | 1  | 7.5   | S | 1  | 8.1   |
| CLSTN1    | S | 4  | 55    | S | 2  | 60.8  |
| COL1A1    | S | 9  | 97    | S | 5  | 111   |
| MMP2      | S | 8  | 127   | S | 2  | 152   |
| HNRNPA2B1 | S | 3  | 18    | S | 1  | 22.1  |
| THBS1     | S | 4  | 34.7  | S | 3  | 46.9  |
| SPTAN1    | S | 16 | 82.3  | S | 8  | 115   |
| TUBA1A    | S | 0  | 78.9  | S | 0  | 118   |
| ZYX       | S | 1  | 2     | R | 0  | 3     |
| LAMB1     | S | 4  | 122   | S | 3  | 184   |
| TPM2      | S | 1  | 13.1  | S | 3  | 19.9  |
| HDGF      | S | 1  | 14.8  | R | 0  | 23.4  |
| PCOLCE    | S | 1  | 273   | S | 2  | 463   |
| PSMB2     | S | 2  | 89.8  | S | 2  | 156   |
| AK2       | S | 1  | 5.2   | S | 1  | 9.1   |
| APP       | S | 5  | 342   | S | 4  | 626   |
| P4HA2     | S | 1  | 0.81  | A | 0  | 1.5   |
| PREP      | S | 1  | 1     | S | 1  | 1.9   |
| COL6A3    | S | 4  | 1.4   | S | 1  | 2.7   |
| ACTN1     | S | 12 | 5643  | S | 7  | 10945 |
| PSMA6     | S | 3  | 286   | S | 2  | 560   |
| CCDC80    | S | 2  | 9.7   | S | 1  | 19.2  |
| AP2A1     | S | 0  | 1.3   | R | 0  | 2.7   |
| FLNB      | S | 3  | 1.8   | S | 2  | 3.8   |
| PRPH      | S | 3  | 107   | S | 3  | 229   |
| PRDX1     | S | 1  | 6.9   | S | 1  | 14.8  |
| HAPLN3    | S | 2  | 70.4  | S | 2  | 152   |
| PAM       | S | 1  | 2.4   | S | 2  | 5.2   |
| INHBA     | S | 4  | 27.5  | S | 2  | 60.7  |
| AP2A2     | S | 0  | 1.3   | R | 0  | 2.9   |
| RFC2      | R | 0  | 55.9  | S | 1  | 125   |
| HSPA4     | S | 4  | 71.9  | S | 3  | 163   |
| SNRPG     | S | 1  | 61.2  | S | 1  | 139   |
| ASNA1     | S | 1  | 3     | S | 1  | 6.9   |

## SUPPLEMENTARY DATA

|          |   |    |      |   |   |       |
|----------|---|----|------|---|---|-------|
| TPM1     | S | 3  | 344  | S | 2 | 807   |
| FSCN1    | S | 2  | 41.8 | S | 2 | 98.9  |
| GALNT5   | S | 2  | 81.2 | S | 2 | 195   |
| PDIA4    | S | 2  | 6.4  | S | 1 | 15.5  |
| KRT77    | S | 2  | 25.9 | S | 2 | 63.9  |
| FLNA     | S | 13 | 242  | S | 4 | 600   |
| XYLT2    | S | 1  | 6    | S | 1 | 14.9  |
| UBA1Y    | S | 2  | 7.3  | S | 1 | 18.4  |
| NUCB1    | S | 4  | 326  | S | 4 | 825   |
| LDHB     | S | 2  | 167  | S | 3 | 427   |
| BMP1     | S | 3  | 16.1 | S | 3 | 41.6  |
| TPI1     | S | 2  | 201  | S | 2 | 526   |
| PLOD3    | S | 2  | 13.8 | S | 1 | 38.2  |
| DPP3     | S | 4  | 24.2 | S | 2 | 67.9  |
| BIN1     | S | 2  | 25.3 | S | 1 | 74.4  |
| TAGLN    | S | 4  | 199  | S | 4 | 596   |
| ARPC1A   | S | 2  | 26.5 | S | 1 | 81.5  |
| FLNC     | S | 4  | 15.4 | S | 3 | 47.5  |
| BAG3     | R | 0  | 0.81 | S | 1 | 2.5   |
| TGFBI    | S | 3  | 53.6 | S | 3 | 170   |
| USP5     | S | 1  | 3.7  | S | 1 | 12    |
| RTN4     | S | 1  | 2.8  | S | 1 | 9.5   |
| AGRN     | S | 1  | 11.1 | S | 1 | 38.7  |
| LAMC1    | S | 6  | 31.2 | S | 3 | 114   |
| SF3B3    | S | 2  | 1.2  | S | 1 | 4.4   |
| BSN      | S | 1  | 0.62 | R | 0 | 2.3   |
| UBE2L3   | S | 0  | 57.1 | S | 0 | 213   |
| FSTL1    | S | 1  | 70.3 | S | 1 | 267   |
| ENO2     | S | 2  | 207  | S | 2 | 802   |
| ATP6V1B2 | S | 1  | 2.6  | S | 1 | 10.5  |
| ACTC1    | S | 1  | 142  | S | 2 | 586   |
| PSMA4    | S | 2  | 10   | S | 2 | 41.9  |
| SPTBN1   | S | 7  | 21.1 | S | 9 | 88.5  |
| ARHGAP1  | S | 1  | 15.9 | S | 1 | 66.9  |
| SEMA7A   | S | 1  | 73.7 | S | 1 | 311   |
| HAPLN1   | S | 5  | 72.3 | S | 3 | 322   |
| UGP2     | S | 2  | 31.4 | S | 1 | 142   |
| FAT1     | S | 1  | 0.93 | S | 1 | 4.5   |
| ALDOA    | S | 1  | 139  | S | 1 | 674   |
| WNT5A    | S | 1  | 1.6  | R | 0 | 7.9   |
| MVP      | S | 1  | 0.78 | S | 1 | 3.9   |
| DPYSL2   | S | 0  | 80.3 | S | 0 | 406   |
| PXDN     | S | 4  | 10.5 | S | 4 | 55.8  |
| CALU     | S | 4  | 930  | S | 4 | 5080  |
| MYL6     | S | 3  | 293  | S | 2 | 1607  |
| DPYSL3   | S | 0  | 82.9 | S | 1 | 459   |
| EFEMP2   | S | 1  | 68.1 | S | 1 | 381   |
| KRT78    | S | 1  | 4.8  | S | 1 | 27    |
| PRSS23   | S | 2  | 28.9 | S | 1 | 166   |
| COL4A1   | S | 3  | 123  | S | 3 | 721   |
| CDH6     | S | 2  | 9.6  | S | 1 | 56.5  |
| SPOCK1   | S | 2  | 2    | S | 1 | 11.9  |
| RPL5     | S | 1  | 4.2  | S | 1 | 25.9  |
| SEMA5A   | S | 1  | 18.1 | S | 1 | 112   |
| DNM1L    | S | 1  | 0.92 | A | 0 | 5.9   |
| ACTB     | S | 8  | 1742 | S | 7 | 11343 |
| PSMB3    | S | 1  | 22.1 | S | 1 | 146   |
| EHD2     | S | 2  | 16.4 | S | 2 | 109   |
| TIMP2    | S | 2  | 9.1  | S | 1 | 62    |

# SUPPLEMENTARY DATA

|            |   |   |      |   |   |      |
|------------|---|---|------|---|---|------|
| YWHAE      | S | 3 | 235  | S | 2 | 1654 |
| GDI2       | S | 3 | 158  | S | 2 | 1314 |
| CTNNB1     | S | 2 | 2.1  | S | 1 | 18.1 |
| COL4A5     | S | 1 | 1.6  | S | 1 | 14.1 |
| PRDX6      | S | 1 | 35.8 | S | 1 | 338  |
| TUBB5      | S | 1 | 152  | S | 1 | 1469 |
| VCAN       | S | 6 | 23.3 | S | 4 | 228  |
| ACTN4      | S | 3 | 141  | S | 2 | 1401 |
| CTPS       | S | 1 | 1.6  | S | 1 | 16.3 |
| PRSS2      | S | 1 | 104  | S | 1 | 1118 |
| PKM        | S | 9 | 134  | S | 8 | 1454 |
| GALNT10    | S | 1 | 6.7  | S | 1 | 72.8 |
| GLG1       | S | 1 | 0.1  | S | 1 | 1.1  |
| PLS3       | S | 3 | 33.6 | S | 5 | 386  |
| SEPT7      | S | 1 | 19.1 | S | 2 | 224  |
| NID2       | S | 1 | 1.2  | S | 1 | 15.5 |
| SERPINH1   | S | 1 | 5.8  | S | 3 | 78   |
| GAPDH      | S | 0 | 19.9 | S | 0 | 273  |
| GAPDH-PS15 | S | 0 | 19.9 | S | 0 | 273  |
| PCDH10     | A | 0 | 0.16 | S | 1 | 2.2  |
| PFKP       | R | 0 | 1.1  | S | 1 | 16.6 |
| ACLY       | S | 1 | 1.5  | S | 1 | 22.8 |
| HSP90AB1   | S | 4 | 19.7 | S | 1 | 301  |
| ACTR2      | S | 1 | 4.3  | R | 0 | 66.9 |
| ACTR3      | S | 3 | 23.6 | S | 2 | 371  |
| EFNB2      | R | 0 | 7    | S | 1 | 145  |
| ALCAM      | S | 2 | 23.8 | S | 2 | 502  |
| SERPINE2   | S | 0 | 3.2  | S | 1 | 68   |
| HSPA5      | R | 0 | 0.27 | S | 1 | 5.8  |
| GFRA1      | S | 1 | 0.6  | S | 1 | 13.6 |
| PUF60      | S | 1 | 0.53 | S | 1 | 12.5 |
| TXNDC5     | R | 0 | 41.8 | S | 2 | 1065 |
| CALM3      | S | 2 | 49.8 | S | 2 | 1316 |
| SEPT2      | S | 3 | 22.6 | S | 3 | 627  |
| MYL12B     | S | 2 | 39   | S | 2 | 1083 |
| EHD1       | R | 0 | 3.2  | S | 3 | 92.3 |
| MEGF8      | S | 1 | 0.71 | S | 2 | 21.4 |
| GANAB      | S | 1 | 1.1  | S | 2 | 34.8 |
| HYOU1      | S | 1 | 1.8  | S | 3 | 70.4 |
| EIF4A2     | S | 0 | 0.82 | S | 0 | 33.3 |
| EIF4A1     | S | 0 | 0.74 | S | 0 | 30.1 |
| TRY4       | R | 0 | 2.9  | R | 0 | 128  |
| GM5771     | R | 0 | 2.9  | R | 0 | 128  |
| PRSS1      | R | 0 | 3.1  | R | 0 | 139  |
| TLN1       | S | 1 | 2.1  | S | 7 | 99.6 |
| COPS5      | R | 0 | 0.49 | S | 1 | 24.3 |
| ENPP2      | R | 0 | 0.59 | S | 2 | 29.3 |
| PPP2R1A    | S | 0 | 0.47 | S | 0 | 25   |
| PPP2R1B    | S | 0 | 0.46 | S | 0 | 24.6 |
| ANXA2      | S | 1 | 17.1 | S | 2 | 1111 |
| LTBP1      | S | 1 | 3.8  | S | 1 | 285  |
| ACAN       | S | 1 | 1.3  | S | 1 | 179  |
| HSPH1      | S | 1 | 0.1  | S | 1 | 13.8 |
| PYGB       | S | 1 | 0.23 | S | 2 | 32.7 |
| SYNCRIP    | S | 1 | 0.51 | S | 1 | 75.5 |
| CAPZA2     | R | 0 | 0.22 | S | 1 | 87.1 |
| HBB-BS     |   | 0 | 0    | S | 0 | 6.6  |
| HBB-B1     |   | 0 | 0    | S | 0 | 6.3  |
| HBB-B2     |   | 0 | 0    | S | 0 | 6.3  |

## SUPPLEMENTARY DATA

|          |   |   |   |   |   |      |
|----------|---|---|---|---|---|------|
| UBA52    |   | 0 | 0 | R | 0 | 0.92 |
| KRT73    | A | 0 | 0 | S | 0 | 120  |
| UBB      |   | 0 | 0 | R | 0 | 0.33 |
| UBC      |   | 0 | 0 | R | 0 | 0.14 |
| PRDX4    |   | 0 | 0 | S | 1 | 190  |
| RPS24    |   | 0 | 0 | S | 1 | 21.2 |
| KRT6A    | A | 0 | 0 | S | 0 | 41.7 |
| KRT75    | A | 0 | 0 | S | 0 | 39.1 |
| LMNA     |   | 0 | 0 | S | 1 | 0.66 |
| SRPX2    |   | 0 | 0 | S | 1 | 13.7 |
| PDCD6IP  |   | 0 | 0 | S | 2 | 49.8 |
| RPS2     |   | 0 | 0 | S | 1 | 8.4  |
| RRAS     |   | 0 | 0 | S | 1 | 5.4  |
| CDH13    |   | 0 | 0 | R | 0 | 5.5  |
| PABPC4   |   | 0 | 0 | S | 0 | 26.5 |
| PABPC1   |   | 0 | 0 | S | 0 | 24.7 |
| IQGAP1   |   | 0 | 0 | S | 2 | 42.9 |
| ACTR1B   |   | 0 | 0 | S | 0 | 18.9 |
| ACTR1A   |   | 0 | 0 | S | 0 | 18   |
| TUBB2B   | A | 0 | 0 | S | 0 | 707  |
| ATP5B    |   | 0 | 0 | S | 1 | 9    |
| HSPD1    |   | 0 | 0 | R | 0 | 17.4 |
| RPS10    |   | 0 | 0 | S | 1 | 23   |
| CAMK2D   |   | 0 | 0 | S | 1 | 6.1  |
| ESD      |   | 0 | 0 | S | 1 | 73.9 |
| YWHAB    | A | 0 | 0 | S | 1 | 872  |
| ERO1L    |   | 0 | 0 | S | 1 | 5.8  |
| GM10705  | A | 0 | 0 | S | 0 | 213  |
| ECM2     |   | 0 | 0 | S | 1 | 11.1 |
| RAB2A    |   | 0 | 0 | S | 1 | 11.1 |
| PAFAH1B1 |   | 0 | 0 | S | 1 | 9.2  |
| STAT1    |   | 0 | 0 | R | 0 | 12.2 |
| NPEPPS   |   | 0 | 0 | S | 2 | 28.3 |
| EPPK1    | S | 1 | 0 | S | 1 | 7.8  |
| PPP2R2A  |   | 0 | 0 | S | 0 | 3.8  |
| PDCD6    |   | 0 | 0 | S | 1 | 31.1 |
| YWHAQ    | A | 0 | 0 | S | 1 | 373  |
| ADAMTS7  |   | 0 | 0 | S | 1 | 21   |
| NEO1     |   | 0 | 0 | S | 1 | 14   |
| GNAI2    |   | 0 | 0 | S | 2 | 26.7 |
| DDB1     | R | 0 | 0 | S | 1 | 4.6  |
| ASNS     |   | 0 | 0 | S | 1 | 33.5 |
| TUBB2A   | A | 0 | 0 | S | 0 | 707  |
| PPP2R2B  |   | 0 | 0 | S | 0 | 4    |
| ITGA3    |   | 0 | 0 | S | 1 | 6.8  |
| LOXL3    | S | 1 | 0 | S | 2 | 12   |
| MYL9     | R | 0 | 0 | S | 1 | 134  |
| EPHA5    | A | 0 | 0 | S | 2 | 255  |
| RNASE4   | A | 0 | 0 | S | 1 | 18.1 |
| TPM3     | A | 0 | 0 | S | 0 | 1.5  |
| CAPN2    |   | 0 | 0 | S | 1 | 30.9 |
| LAP3     |   | 0 | 0 | S | 1 | 21.3 |
| PTPRK    |   | 0 | 0 | S | 1 | 0.05 |
| VPS35    |   | 0 | 0 | S | 1 | 5.4  |
| WARS     |   | 0 | 0 | R | 0 | 3.9  |
| ATRN     |   | 0 | 0 | R | 0 | 7    |
| CAPG     |   | 0 | 0 | S | 1 | 18.7 |
| IDS      |   | 0 | 0 | S | 1 | 20.2 |
| NPR3     |   | 0 | 0 | S | 1 | 76.9 |

# SUPPLEMENTARY DATA

|               |   |   |      |   |   |      |
|---------------|---|---|------|---|---|------|
| PVRL2         |   | 0 | 0    | S | 1 | 52.5 |
| FBLN5         |   | 0 | 0    | S | 1 | 56   |
| CUL1          |   | 0 | 0    | S | 1 | 1.5  |
| LSM2          |   | 0 | 0    | S | 1 | 14   |
| SNX3          |   | 0 | 0    | S | 1 | 9.5  |
| MMP19         |   | 0 | 0    | S | 1 | 1.3  |
| SF3B6         |   | 0 | 0    | S | 1 | 17.4 |
| RGMB          |   | 0 | 0    | S | 1 | 54.7 |
| GALNT14       |   | 0 | 0    | S | 1 | 61   |
| CPA4          |   | 0 | 0    | S | 1 | 33   |
| ATP6V1D       |   | 0 | 0    | S | 1 | 8.8  |
| HTRA3         |   | 0 | 0    | S | 1 | 5.5  |
| SIL1          |   | 0 | 0    | S | 1 | 14   |
| ATP6V1H       |   | 0 | 0    | S | 1 | 10.8 |
| TSPAN9        |   | 0 | 0    | S | 1 | 30.8 |
| DCUN1D1       |   | 0 | 0    | S | 1 | 6.9  |
| KIRREL        |   | 0 | 0    | S | 1 | 7.1  |
| MAN1B1        |   | 0 | 0    | S | 1 | 2.2  |
| CKB           |   | 0 | 0    | S | 1 | 82.3 |
| CDH8          |   | 0 | 0    | S | 1 | 8.3  |
| MGAT1         |   | 0 | 0    | S | 1 | 32.6 |
| PCSK5         |   | 0 | 0    | S | 1 | 1.7  |
| MPRIP         |   | 0 | 0    | S | 1 | 0.96 |
| TXNL1         |   | 0 | 0    | S | 1 | 10.1 |
| CARM1         |   | 0 | 0    | S | 1 | 19.3 |
| ASF1A         |   | 0 | 0    | S | 1 | 41.4 |
| MVB12B        |   | 0 | 0    | S | 1 | 2.4  |
| CANT1         |   | 0 | 0    | S | 1 | 7.3  |
| TRIM23        |   | 0 | 0    | S | 1 | 41   |
| REXO2         |   | 0 | 0    | S | 1 | 8    |
| RCC2          |   | 0 | 0    | S | 1 | 1.8  |
| OLFM2         |   | 0 | 0    | S | 1 | 6.8  |
| ROCK1         |   | 0 | 0    | S | 0 | 0.29 |
| ROCK2         |   | 0 | 0    | S | 0 | 0.31 |
| 4732456N10RIK | S | 1 | 194  | A | 0 | 0    |
| TSPAN4        | S | 1 | 179  |   | 0 | 0    |
| TSN           | S | 1 | 160  |   | 0 | 0    |
| ITGB1         | S | 2 | 158  |   | 0 | 0    |
| TUBA1C        | S | 1 | 119  | A | 0 | 0    |
| ASPM          | S | 1 | 111  |   | 0 | 0    |
| TUBA1B        | S | 0 | 109  | A | 0 | 0    |
| CRK           | S | 1 | 96.5 |   | 0 | 0    |
| RBBP4         | S | 1 | 82.8 |   | 0 | 0    |
| GNB2          | S | 3 | 78.1 | A | 0 | 0    |
| TUBB4B        | S | 1 | 58.9 | A | 0 | 0    |
| EEF1G         | S | 1 | 51   |   | 0 | 0    |
| TGFB2         | S | 2 | 39.7 |   | 0 | 0    |
| CDC37         | S | 1 | 38.1 |   | 0 | 0    |
| PFDN5         | S | 1 | 36.1 |   | 0 | 0    |
| CPB2          | S | 1 | 34.9 |   | 0 | 0    |
| NAP1L1        | S | 1 | 32.8 |   | 0 | 0    |
| SERPINI2      | S | 1 | 30.6 | S | 1 | 0    |
| PCBD1         | S | 1 | 29.4 |   | 0 | 0    |
| RPLP2         | S | 2 | 27.4 | S | 1 | 0    |
| ABI3BP        | S | 1 | 26.9 | R | 0 | 0    |
| PGD           | S | 1 | 26.7 |   | 0 | 0    |
| PSMC1         | S | 3 | 25.2 |   | 0 | 0    |
| EIF3A         | S | 2 | 23.8 |   | 0 | 0    |
| IPO5          | S | 4 | 22.8 | A | 0 | 0    |

# SUPPLEMENTARY DATA

|               |   |   |      |   |   |   |
|---------------|---|---|------|---|---|---|
| PARVA         | S | 1 | 21.5 |   | 0 | 0 |
| 2210010C04RIK | S | 1 | 20.5 |   | 0 | 0 |
| TWF2          | S | 1 | 20.1 | R | 0 | 0 |
| ARPC4         | S | 1 | 19.3 |   | 0 | 0 |
| RPS4X         | S | 1 | 18.8 |   | 0 | 0 |
| HNRNPK        | S | 1 | 15.6 |   | 0 | 0 |
| RANBP1        | S | 1 | 15.1 |   | 0 | 0 |
| JAG1          | S | 1 | 15.1 |   | 0 | 0 |
| LMAN2         | S | 1 | 15   |   | 0 | 0 |
| PAICS         | S | 1 | 14.6 |   | 0 | 0 |
| NUTF2         | R | 0 | 13.8 | S | 1 | 0 |
| OTUB1         | S | 1 | 13.8 |   | 0 | 0 |
| TARS          | S | 1 | 13.1 |   | 0 | 0 |
| CHID1         | S | 1 | 12.4 |   | 0 | 0 |
| CAPRIN1       | S | 1 | 12.3 |   | 0 | 0 |
| PFAS          | S | 1 | 11.7 |   | 0 | 0 |
| COPS6         | S | 1 | 11.5 |   | 0 | 0 |
| XPO1          | S | 2 | 11.3 |   | 0 | 0 |
| THBS2         | S | 1 | 10.6 | A | 0 | 0 |
| COPS2         | S | 1 | 10.1 |   | 0 | 0 |
| FAM20B        | S | 1 | 9.9  |   | 0 | 0 |
| SSB           | S | 2 | 9    | R | 0 | 0 |
| DLG1          | S | 1 | 7.9  |   | 0 | 0 |
| ALDH16A1      | S | 1 | 7.9  |   | 0 | 0 |
| CBX1          | S | 2 | 7.7  |   | 0 | 0 |
| TINAGL1       | S | 1 | 7.4  |   | 0 | 0 |
| COPS7B        | S | 1 | 7.1  |   | 0 | 0 |
| NMT1          | S | 1 | 7    |   | 0 | 0 |
| MAMDC2        | S | 2 | 6.6  |   | 0 | 0 |
| GMPR2         | S | 1 | 6.3  |   | 0 | 0 |
| AP2B1         | S | 0 | 6.1  |   | 0 | 0 |
| P4HB          | S | 2 | 6    |   | 0 | 0 |
| LAMA5         | S | 1 | 6    |   | 0 | 0 |
| GNB4          | S | 0 | 5.7  |   | 0 | 0 |
| PRPSAP2       | S | 1 | 5.7  |   | 0 | 0 |
| IDH1          | S | 1 | 5.7  |   | 0 | 0 |
| HNRNPA1       | S | 1 | 5.5  |   | 0 | 0 |
| ANGPTL2       | S | 1 | 5.3  |   | 0 | 0 |
| CDC42         | S | 1 | 5.1  |   | 0 | 0 |
| ASPH          | S | 1 | 5.1  |   | 0 | 0 |
| PSMA8         | A | 0 | 4.9  |   | 0 | 0 |
| LDLR          | S | 1 | 4.7  |   | 0 | 0 |
| SKP1A         | S | 1 | 4.6  |   | 0 | 0 |
| EIF3B         | S | 2 | 4.5  |   | 0 | 0 |
| PRPF19        | S | 1 | 4.3  |   | 0 | 0 |
| EVA1B         | S | 1 | 4.2  |   | 0 | 0 |
| SERPINC1      | S | 2 | 4.1  |   | 0 | 0 |
| COPB1         | S | 2 | 4.1  |   | 0 | 0 |
| OS9           | S | 1 | 4    |   | 0 | 0 |
| EFTUD2        | S | 1 | 3.9  |   | 0 | 0 |
| B4GAT1        | S | 1 | 3.6  |   | 0 | 0 |
| H2-K1         | S | 1 | 3.4  |   | 0 | 0 |
| ALDOART1      | S | 1 | 3.4  | A | 0 | 0 |
| FBN2          | S | 3 | 3.3  |   | 0 | 0 |
| CACYBP        | A | 0 | 3.2  |   | 0 | 0 |
| SERPINB3C     | S | 0 | 3    | A | 0 | 0 |
| COPS4         | S | 1 | 3    |   | 0 | 0 |
| CCT7          | S | 2 | 2.9  |   | 0 | 0 |
| HNRNPC        | S | 2 | 2.8  |   | 0 | 0 |



# SUPPLEMENTARY DATA

|          |   |   |      |   |   |   |
|----------|---|---|------|---|---|---|
| SEPT11   | S | 1 | 2.8  |   | 0 | 0 |
| CEMP     | S | 1 | 2.7  |   | 0 | 0 |
| CUL4A    | S | 1 | 2.7  |   | 0 | 0 |
| CSNK2A1  | S | 1 | 2.6  |   | 0 | 0 |
| LTA4H    | S | 1 | 2.5  |   | 0 | 0 |
| LTBP3    | S | 1 | 2.4  | R | 0 | 0 |
| IARS     | S | 1 | 2.3  |   | 0 | 0 |
| MYH10    | S | 0 | 2.2  |   | 0 | 0 |
| CDH2     | S | 1 | 2.2  |   | 0 | 0 |
| PBDC1    | S | 1 | 2.1  |   | 0 | 0 |
| CS       | R | 0 | 1.9  |   | 0 | 0 |
| CFL2     | S | 1 | 1.8  |   | 0 | 0 |
| NRP1     | S | 2 | 1.7  |   | 0 | 0 |
| SEC24A   | S | 1 | 1.7  |   | 0 | 0 |
| PABPN1   | S | 1 | 1.4  |   | 0 | 0 |
| PPME1    | S | 1 | 1.4  |   | 0 | 0 |
| RAB1B    | S | 1 | 1.3  | S | 1 | 0 |
| TMPO     | R | 0 | 1.2  |   | 0 | 0 |
| CAND1    | S | 1 | 1.1  | A | 0 | 0 |
| SND1     | S | 1 | 1    |   | 0 | 0 |
| COPS3    | S | 1 | 0.95 |   | 0 | 0 |
| KANK2    | S | 1 | 0.95 |   | 0 | 0 |
| RPS6     | A | 0 | 0.85 |   | 0 | 0 |
| COPG1    | R | 0 | 0.79 |   | 0 | 0 |
| PRPF8    | S | 2 | 0.78 |   | 0 | 0 |
| TENM3    | S | 1 | 0.77 |   | 0 | 0 |
| EPRS     | R | 0 | 0.75 | S | 1 | 0 |
| DCPS     | S | 1 | 0.71 |   | 0 | 0 |
| UBXN7    | S | 1 | 0.69 |   | 0 | 0 |
| EIF3D    | R | 0 | 0.64 |   | 0 | 0 |
| A2M      | S | 1 | 0.63 |   | 0 | 0 |
| EMILIN1  | S | 1 | 0.62 |   | 0 | 0 |
| SSC5D    | S | 2 | 0.62 |   | 0 | 0 |
| HIST1H4H | S | 0 | 0.59 |   | 0 | 0 |
| HIST2H4  | S | 0 | 0.59 |   | 0 | 0 |
| HIST1H4C | S | 0 | 0.59 |   | 0 | 0 |
| HIST1H4D | S | 0 | 0.59 |   | 0 | 0 |
| HIST1H4I | S | 0 | 0.59 |   | 0 | 0 |
| HIST1H4J | S | 0 | 0.59 |   | 0 | 0 |
| HIST1H4K | S | 0 | 0.59 |   | 0 | 0 |
| HIST1H4N | S | 0 | 0.59 |   | 0 | 0 |
| HIST4H4  | S | 0 | 0.59 |   | 0 | 0 |
| HIST1H4A | S | 0 | 0.59 |   | 0 | 0 |
| HIST1H4B | S | 0 | 0.59 |   | 0 | 0 |
| HIST1H4M | S | 0 | 0.59 |   | 0 | 0 |
| MIF      | A | 0 | 0.59 |   | 0 | 0 |
| GSPT1    | S | 1 | 0.58 |   | 0 | 0 |
| EIF4G3   | S | 1 | 0.54 |   | 0 | 0 |
| KCNH5    | R | 0 | 0.51 |   | 0 | 0 |
| DAG1     | S | 1 | 0.34 |   | 0 | 0 |
| MYOF     | S | 1 | 0.28 |   | 0 | 0 |
| DDX42    | S | 1 | 0.27 |   | 0 | 0 |
| GHRL     | R | 0 | 0.24 |   | 0 | 0 |
| GFPT1    | S | 1 | 0.23 |   | 0 | 0 |
| PCBP1    | S | 1 | 0.19 |   | 0 | 0 |
| VDAC1    | S | 1 | 0.17 |   | 0 | 0 |
| LDHA     | R | 0 | 0.14 |   | 0 | 0 |
| EML1     | S | 0 | 0.14 |   | 0 | 0 |
| EML4     | S | 0 | 0.13 |   | 0 | 0 |

# SUPPLEMENTARY DATA

|          |   |   |      |   |   |   |
|----------|---|---|------|---|---|---|
| FAP      | A | 0 | 0.12 |   | 0 | 0 |
| EIF2S3Y  | S | 0 | 0.11 |   | 0 | 0 |
| EIF3M    | A | 0 | 0.11 |   | 0 | 0 |
| EIF2S3X  | S | 0 | 0.11 |   | 0 | 0 |
| SNRNP200 | R | 0 | 0.1  |   | 0 | 0 |
| KRT10    | S | 1 | 0.08 | R | 0 | 0 |
| TNC      | S | 1 | 0.04 |   | 0 | 0 |
| LTBP2    | R | 0 | 0.02 |   | 0 | 0 |
| NUMA1    | R | 0 | 0.01 |   | 0 | 0 |

\*Strict, Relaxed, and All (SRA)

#Proteins were assembled with unique and strict peptides (<1% FDR, usPepts)

†For label-free quantification fraction of total (iFOT)

**Supplementary Table 2.** IPA analyses on proteins completely unique to P5 EVs with P value < 0.05.

| Ingenuity Canonical Pathways                       | -log(p-value) | Ratio  | z-score | Molecules                                                |
|----------------------------------------------------|---------------|--------|---------|----------------------------------------------------------|
| Germ Cell-Sertoli Cell Junction Signaling          | 6.13          | 0.0526 | #NUM !  | A2M,Cdc42,CDH2,CFL2,ITGB1,TGFB2,TUBA1B,TUBA1C,TUBB4B     |
| Regulation of eIF4 and p70S6K Signaling            | 5.96          | 0.0503 | #NUM !  | EIF2S3,EIF3A,EIF3B,EIF3D,EIF3M,EIF4G3,ITGB1,RPS4Y1,RPS6  |
| Epithelial Adherens Junction Signaling             | 5.38          | 0.0506 | #NUM !  | ARPC4,CDH2,CRK,MYH10,TGFB2,TUBA1B,TUBA1C,TUBB4B          |
| Coronavirus Replication Pathway                    | 5.2           | 0.111  | #NUM !  | COPB1,COPG1,TUBA1B,TUBA1C,TUBB4B                         |
| EIF2 Signaling                                     | 5.16          | 0.0402 | #NUM !  | EIF2S3,EIF3A,EIF3B,EIF3D,EIF3M,EIF4G3,RPLP2,RPS4Y1,RPS6  |
| NER (Nucleotide Excision Repair, Enhanced Pathway) | 4.5           | 0.0583 | #NUM !  | Cops2,COPS3,COPS4,COPS6,COPS7B,CUL4A                     |
| mTOR Signaling                                     | 4.45          | 0.0377 | #NUM !  | Cdc42,EIF3A,EIF3B,EIF3D,EIF3M,EIF4G3,RPS4Y1,RPS6         |
| RhoGDI Signaling                                   | 4.41          | 0.0372 | #NUM !  | ARPC4,Cdc42,CDH2,CFL2,GNB2,GNB4,ITGB1,MYH10              |
| RAN Signaling                                      | 3.91          | 0.176  | #NUM !  | IPO5,RANBP1,XPO1                                         |
| Semaphorin Signaling in Neurons                    | 3.33          | 0.0645 | #NUM !  | Cdc42,CFL2,ITGB1,NRP1                                    |
| Remodeling of Epithelial Adherens Junctions        | 3.17          | 0.0588 | #NUM !  | ARPC4,TUBA1B,TUBA1C,TUBB4B                               |
| Axonal Guidance Signaling                          | 3.11          | 0.0198 | #NUM !  | ARPC4,CFL2,CRK,GNB2,GNB4,ITGB1,NRP1,TUBA1B,TUBA1C,TUBB4B |
| Ephrin B Signaling                                 | 3.08          | 0.0556 | #NUM !  | CFL2,GNB2,GNB4,HNRNPK                                    |
| Caveolar-mediated Endocytosis Signaling            | 3.01          | 0.0533 | #NUM !  | COPB1,COPG1,HLA-A,ITGB1                                  |
| Signaling by Rho Family GTPases                    | 3             | 0.0261 | #NUM !  | ARPC4,Cdc42,CDH2,CFL2,GNB2,GNB4,ITGB1                    |
| Ephrin Receptor Signaling                          | 2.93          | 0.0299 | #NUM !  | ARPC4,CFL2,CRK,GNB2,GNB4,ITGB1                           |
| Sertoli Cell-Sertoli Cell Junction Signaling       | 2.88          | 0.0291 | #NUM !  | A2M,DLG1,ITGB1,TUBA1B,TUBA1C,TUBB4B                      |
| tRNA Charging                                      | 2.82          | 0.0769 | #NUM !  | EPRS1,IARS1,TARS1                                        |
| Integrin Signaling                                 | 2.8           | 0.0282 | #NUM !  | ARPC4,Cdc42,CRK,ITGB1,PARVA,TSPAN4                       |
| Purine Nucleotides De Novo Biosynthesis II         | 2.75          | 0.182  | #NUM !  | PAICS,PFAS                                               |

# SUPPLEMENTARY DATA

|                                                |      |        |        |                              |
|------------------------------------------------|------|--------|--------|------------------------------|
| Spliceosomal Cycle                             | 2.53 | 0.0612 | #NUM ! | EFTUD2,PRPF19,SNRNP200       |
| ILK Signaling                                  | 2.21 | 0.0253 | #NUM ! | Cdc42,CFL2,ITGB1,MYH10,PARVA |
| Reelin Signaling in Neurons                    | 2.2  | 0.0317 | #NUM ! | ARPC4,CDH2,CRK,ITGB1         |
| Phagosome Maturation                           | 1.85 | 0.0252 | #NUM ! | HLA-A,TUBA1B,TUBA1C,TUBB4B   |
| Actin Cytoskeleton Signaling                   | 1.84 | 0.0204 | #NUM ! | ARPC4,CFL2,CRK,ITGB1,MYH10   |
| CXCR4 Signaling                                | 1.78 | 0.024  | #NUM ! | Cdc42,CRK,GNB2,GNB4          |
| Actin Nucleation by ARP-WASP Complex           | 1.76 | 0.0323 | #NUM ! | ARPC4,Cdc42,ITGB1            |
| 5-aminoimidazole Ribonucleotide Biosynthesis I | 1.76 | 0.333  | #NUM ! | PFAS                         |
| Inosine-5'-phosphate Biosynthesis II           | 1.76 | 0.333  | #NUM ! | PAICS                        |
| Tyrosine Biosynthesis IV                       | 1.76 | 0.333  | #NUM ! | PCBD1                        |
| Coagulation System                             | 1.75 | 0.0571 | #NUM ! | A2M,SERPINC1                 |
| Inhibition of Matrix Metalloproteases          | 1.66 | 0.0513 | #NUM ! | A2M,THBS2                    |
| Pentose Phosphate Pathway (Oxidative Branch)   | 1.64 | 0.25   | #NUM ! | PGD                          |
| Phenylalanine Degradation I (Aerobic)          | 1.64 | 0.25   | #NUM ! | PCBD1                        |
| PD-1, PD-L1 cancer immunotherapy pathway       | 1.62 | 0.0283 | #NUM ! | CSNK2A1,HLA-A,TGFB2          |
| Paxillin Signaling                             | 1.6  | 0.0278 | #NUM ! | CRK,ITGB1,PARVA              |
| Clathrin-mediated Endocytosis Signaling        | 1.58 | 0.0207 | #NUM ! | ARPC4,CSNK2A1,ITGB1,LDLR     |
| G Protein Signaling Mediated by Tubby          | 1.57 | 0.0455 | #NUM ! | GNB2,GNB4                    |
| Eumelanin Biosynthesis                         | 1.54 | 0.2    | #NUM ! | MIF                          |
| Regulation of Actin-based Motility by Rho      | 1.52 | 0.0259 | #NUM ! | ARPC4,Cdc42,ITGB1            |
| Role of Tissue Factor in Cancer                | 1.52 | 0.0259 | #NUM ! | CFL2,ITGB1,P4HB              |
| Neuregulin Signaling                           | 1.51 | 0.0256 | #NUM ! | CRK,ITGB1,RPS6               |
| Apelin Muscle Signaling Pathway                | 1.5  | 0.0417 | #NUM ! | GNB2,GNB4                    |
| Pyruvate Fermentation to Lactate               | 1.46 | 0.167  | #NUM ! | LDHA                         |
| UDP-N-acetyl-D-glucosamine Biosynthesis II     | 1.46 | 0.167  | #NUM ! | GFPT1                        |
| Synaptogenesis Signaling Pathway               | 1.44 | 0.016  | #NUM ! | ARPC4,CDH2,CRK,NAP1L1,THBS2  |
| 14-3-3-mediated Signaling                      | 1.42 | 0.0236 | #NUM ! | TUBA1B,TUBA1C,TUBB4B         |
| fMLP Signaling in Neutrophils                  | 1.38 | 0.0229 | #NUM ! | ARPC4,GNB2,GNB4              |
| FAT10 Signaling Pathway                        | 1.37 | 0.0357 | #NUM ! | PSMA8,PSMC1                  |

# SUPPLEMENTARY DATA

|                                                     |      |        |        |                                 |
|-----------------------------------------------------|------|--------|--------|---------------------------------|
| CCR3 Signaling in Eosinophils                       | 1.35 | 0.0222 | #NUM ! | CFL2,GNB2,GNB4                  |
| Molecular Mechanisms of Cancer                      | 1.33 | 0.0135 | #NUM ! | Cdc42,CRK,GNB2,GNB4,ITGB1,TGFB2 |
| Rac Signaling                                       | 1.33 | 0.0217 | #NUM ! | ARPC4,CFL2,ITGB1                |
| SPINK1 Pancreatic Cancer Pathway                    | 1.32 | 0.0333 | #NUM ! | 2210010C04Rik,CPB2              |
| Polyamine Regulation in Colon Cancer                | 1.29 | 0.0323 | #NUM ! | PSMA8,PSMC1                     |
| Pentose Phosphate Pathway                           | 1.25 | 0.1    | #NUM ! | PGD                             |
| Glutamate Receptor Signaling                        | 1.25 | 0.0303 | #NUM ! | GNB2,GNB4                       |
| Semaphorin Neuronal Repulsive Signaling Pathway     | 1.23 | 0.0199 | #NUM ! | CFL2,ITGB1,NRP1                 |
| Agrin Interactions at Neuromuscular Junction        | 1.2  | 0.0286 | #NUM ! | DAG1,ITGB1                      |
| Cardiac Hypertrophy Signaling                       | 1.19 | 0.0155 | #NUM ! | Cdc42,GNB2,GNB4,TGFB2           |
| Cleavage and Polyadenylation of Pre-mRNA            | 1.17 | 0.0833 | #NUM ! | PABPN1                          |
| Inhibition of ARE-Mediated mRNA Degradation Pathway | 1.17 | 0.0186 | #NUM ! | PABPN1,PSMA8,PSMC1              |
| Hypoxia Signaling in the Cardiovascular System      | 1.16 | 0.027  | #NUM ! | LDHA,P4HB                       |
| Colorectal Cancer Metastasis Signaling              | 1.14 | 0.0149 | #NUM ! | Cdc42,GNB2,GNB4,TGFB2           |
| Human Embryonic Stem Cell Pluripotency              | 1.14 | 0.0181 | #NUM ! | GNB2,GNB4,TGFB2                 |
| Antiproliferative Role of Somatostatin Receptor 2   | 1.13 | 0.026  | #NUM ! | GNB2,GNB4                       |
| VDR/RXR Activation                                  | 1.12 | 0.0256 | #NUM ! | CSNK2A1,TGFB2                   |
| Gαq Signaling                                       | 1.11 | 0.0176 | #NUM ! | Cdc42,GNB2,GNB4                 |
| Leukotriene Biosynthesis                            | 1.1  | 0.0714 | #NUM ! | LTA4H                           |
| Wnt/β-catenin Signaling                             | 1.09 | 0.0173 | #NUM ! | CDH2,CSNK2A1,TGFB2              |
| Huntington's Disease Signaling                      | 1.08 | 0.0142 | #NUM ! | GNB2,GNB4,PSMA8,PSMC1           |
| BAG2 Signaling Pathway                              | 1.06 | 0.0238 | #NUM ! | PSMA8,PSMC1                     |
| Tumor Microenvironment Pathway                      | 1.06 | 0.0168 | #NUM ! | HLA-A,TGFB2,TNC                 |
| Extrinsic Prothrombin Activation Pathway            | 1.05 | 0.0625 | #NUM ! | SERPINC1                        |
| Chondroitin Sulfate Degradation (Metazoa)           | 1.05 | 0.0625 | #NUM ! | CEMIP                           |
| PDGF Signaling                                      | 1.05 | 0.0233 | #NUM ! | CRK,CSNK2A1                     |
| Sirtuin Signaling Pathway                           | 1.04 | 0.0137 | #NUM ! | LDHA,TUBA1B,TUBA1C,VDAC1        |
| Dermatan Sulfate Degradation (Metazoa)              | 1.02 | 0.0588 | #NUM ! | CEMIP                           |
| Cardiac Hypertrophy Signaling (Enhanced)            | 1.02 | 0.0112 | #NUM ! | DLG1,GNB2,GNB4,ITGB1,RPS6,TGFB2 |

## SUPPLEMENTARY DATA

|                                                                 |       |        |        |                                           |
|-----------------------------------------------------------------|-------|--------|--------|-------------------------------------------|
| Unfolded protein response                                       | 1.01  | 0.0222 | #NUM ! | OS9,P4HB                                  |
| Fcγ Receptor-mediated Phagocytosis in Macrophages and Monocytes | 0.983 | 0.0213 | #NUM ! | ARPC4,CRK                                 |
| IL-1 Signaling                                                  | 0.983 | 0.0213 | #NUM ! | GNB2,GNB4                                 |
| Hepatic Fibrosis / Hepatic Stellate Cell Activation             | 0.979 | 0.0155 | #NUM ! | A2M,MYH10,TGFB2                           |
| Regulation of the Epithelial-Mesenchymal Transition Pathway     | 0.975 | 0.0154 | #NUM ! | CDH2,JAG1,TGFB2                           |
| HER-2 Signaling in Breast Cancer                                | 0.971 | 0.0153 | #NUM ! | COPS6,ITGB1,RPS6                          |
| Gap Junction Signaling                                          | 0.963 | 0.0152 | #NUM ! | TUBA1B,TUBA1C,TUBB4B                      |
| Natural Killer Cell Signaling                                   | 0.955 | 0.0151 | #NUM ! | CFL2,HLA-A,ITGB1                          |
| HIF1α Signaling                                                 | 0.914 | 0.0144 | #NUM ! | LDHA,RPS6,TGFB2                           |
| Virus Entry via Endocytic Pathways                              | 0.91  | 0.0192 | #NUM ! | HLA-A,ITGB1                               |
| Thrombin Signaling                                              | 0.907 | 0.0143 | #NUM ! | Cdc42,GNB2,GNB4                           |
| IL-8 Signaling                                                  | 0.9   | 0.0142 | #NUM ! | Cdc42,GNB2,GNB4                           |
| Apelin Cardiac Fibroblast Signaling Pathway                     | 0.9   | 0.0435 | #NUM ! | TGFB2                                     |
| α-Adrenergic Signaling                                          | 0.896 | 0.0189 | #NUM ! | GNB2,GNB4                                 |
| Chronic Myeloid Leukemia Signaling                              | 0.889 | 0.0187 | #NUM ! | CRK,TGFB2                                 |
| TCA Cycle II (Eukaryotic)                                       | 0.883 | 0.0417 | #NUM ! | CS                                        |
| Breast Cancer Regulation by Stathmin1                           | 0.876 | 0.0101 | #NUM ! | GNB2,GNB4,TGFB2,TUBA1B,TUBA1C,TUBB4B      |
| Role of NFAT in Cardiac Hypertrophy                             | 0.863 | 0.0136 | #NUM ! | GNB2,GNB4,TGFB2                           |
| Systemic Lupus Erythematosus Signaling                          | 0.86  | 0.01   | #NUM ! | EFTUD2,HLA-A,HNRNPC,PRPF19,PRPF8,SNRNP200 |
| CDK5 Signaling                                                  | 0.857 | 0.0179 | #NUM ! | ITGB1,LAMA5                               |
| FAK Signaling                                                   | 0.827 | 0.0171 | #NUM ! | CRK,ITGB1                                 |
| PAK Signaling                                                   | 0.821 | 0.0169 | #NUM ! | CFL2,ITGB1                                |
| Neuroprotective Role of THOP1 in Alzheimer's Disease            | 0.821 | 0.0169 | #NUM ! | FAP,HLA-A                                 |
| Gαs Signaling                                                   | 0.804 | 0.0165 | #NUM ! | GNB2,GNB4                                 |
| Endocannabinoid Developing Neuron Pathway                       | 0.793 | 0.0163 | #NUM ! | GNB2,GNB4                                 |
| RhoA Signaling                                                  | 0.788 | 0.0161 | #NUM ! | ARPC4,CFL2                                |
| Airway Inflammation in Asthma                                   | 0.767 | 0.0312 | #NUM ! | TGFB2                                     |
| IL-6 Signaling                                                  | 0.767 | 0.0156 | #NUM ! | A2M,CSNK2A1                               |

## SUPPLEMENTARY DATA

|                                                                    |       |             |           |                           |
|--------------------------------------------------------------------|-------|-------------|-----------|---------------------------|
| G Beta Gamma Signaling                                             | 0.762 | 0.0155      | #NUM<br>! | GNB2,GNB4                 |
| P2Y Purigenic Receptor Signaling Pathway                           | 0.762 | 0.0155      | #NUM<br>! | GNB2,GNB4                 |
| GABA Receptor Signaling                                            | 0.75  | 0.0153      | #NUM<br>! | GNB2,GNB4                 |
| DNA Methylation and Transcriptional Repression Signaling           | 0.733 | 0.0286      | #NUM<br>! | RBBP4                     |
| MIF-mediated Glucocorticoid Regulation                             | 0.721 | 0.0278      | #NUM<br>! | MIF                       |
| Th2 Pathway                                                        | 0.721 | 0.0146      | #NUM<br>! | HLA-A,JAG1                |
| Gai Signaling                                                      | 0.717 | 0.0145      | #NUM<br>! | GNB2,GNB4                 |
| Apelin Endothelial Signaling Pathway                               | 0.712 | 0.0144      | #NUM<br>! | GNB2,GNB4                 |
| Notch Signaling                                                    | 0.701 | 0.0263      | #NUM<br>! | JAG1                      |
| Thyroid Hormone Metabolism II (via Conjugation and/or Degradation) | 0.69  | 0.0256      | #NUM<br>! | B4GAT1                    |
| Antigen Presentation Pathway                                       | 0.69  | 0.0256      | #NUM<br>! | HLA-A                     |
| Protein Kinase A Signaling                                         | 0.682 | 0.0099<br>5 | #NUM<br>! | GNB2,GNB4,MYH10,TGFB2     |
| Endocannabinoid Neuronal Synapse Pathway                           | 0.676 | 0.0136      | #NUM<br>! | GNB2,GNB4                 |
| Mechanisms of Viral Exit from Host Cells                           | 0.672 | 0.0244      | #NUM<br>! | XPO1                      |
| Phagosome Formation                                                | 0.666 | 0.0134      | #NUM<br>! | Cdc42,ITGB1               |
| Intrinsic Prothrombin Activation Pathway                           | 0.662 | 0.0238      | #NUM<br>! | SERPINC1                  |
| PTEN Signaling                                                     | 0.662 | 0.0133      | #NUM<br>! | CSNK2A1,ITGB1             |
| NAD Signaling Pathway                                              | 0.658 | 0.0132      | #NUM<br>! | LDHA,TGFB2                |
| B Cell Development                                                 | 0.654 | 0.0233      | #NUM<br>! | HLA-A                     |
| Serotonin Receptor Signaling                                       | 0.654 | 0.0233      | #NUM<br>! | PCBD1                     |
| Relaxin Signaling                                                  | 0.65  | 0.0131      | #NUM<br>! | GNB2,GNB4                 |
| MIF Regulation of Innate Immunity                                  | 0.644 | 0.0227      | #NUM<br>! | MIF                       |
| Role of NFAT in Regulation of the Immune Response                  | 0.627 | 0.0088<br>2 | #NUM<br>! | GNB2,GNB4,HLA-A,IPO5,XPO1 |
| PFKFB4 Signaling Pathway                                           | 0.627 | 0.0217      | #NUM<br>! | TGFB2                     |
| Aryl Hydrocarbon Receptor Signaling                                | 0.625 | 0.0126      | #NUM<br>! | ALDH16A1,TGFB2            |
| Ephrin A Signaling                                                 | 0.62  | 0.0213      | #NUM<br>! | CFL2                      |
| nNOS Signaling in Skeletal Muscle Cells                            | 0.611 | 0.0208      | #NUM<br>! | DAG1                      |

# SUPPLEMENTARY DATA

|                                                                               |       |             |           |                      |
|-------------------------------------------------------------------------------|-------|-------------|-----------|----------------------|
| HMGB1 Signaling                                                               | 0.595 | 0.012       | #NUM<br>! | Cdc42,TGFB2          |
| Gustation Pathway                                                             | 0.595 | 0.012       | #NUM<br>! | GNB2,GNB4            |
| FAT10 Cancer Signaling Pathway                                                | 0.595 | 0.02        | #NUM<br>! | TGFB2                |
| Triacylglycerol Degradation                                                   | 0.588 | 0.0196      | #NUM<br>! | PPME1                |
| Amyloid Processing                                                            | 0.588 | 0.0196      | #NUM<br>! | CSNK2A1              |
| Androgen Signaling                                                            | 0.587 | 0.0118      | #NUM<br>! | GNB2,GNB4            |
| Th1 and Th2 Activation Pathway                                                | 0.577 | 0.0116      | #NUM<br>! | HLA-A,JAG1           |
| Cardiac $\beta$ -adrenergic Signaling                                         | 0.57  | 0.0115      | #NUM<br>! | GNB2,GNB4            |
| EGF Signaling                                                                 | 0.561 | 0.0182      | #NUM<br>! | CSNK2A1              |
| Tight Junction Signaling                                                      | 0.556 | 0.0112      | #NUM<br>! | MYH10,TGFB2          |
| Nicotine Degradation III                                                      | 0.541 | 0.0172      | #NUM<br>! | B4GAT1               |
| Acute Phase Response Signaling                                                | 0.533 | 0.0108      | #NUM<br>! | A2M,HNRNPK           |
| GNRH Signaling                                                                | 0.523 | 0.0106      | #NUM<br>! | GNB2,GNB4            |
| Melatonin Degradation I                                                       | 0.523 | 0.0164      | #NUM<br>! | B4GAT1               |
| IL-2 Signaling                                                                | 0.523 | 0.0164      | #NUM<br>! | CSNK2A1              |
| SAPK/JNK Signaling                                                            | 0.513 | 0.0083<br>3 | #NUM<br>! | CRK,GNB2,GNB4,HNRNPK |
| Regulation Of The Epithelial Mesenchymal Transition By Growth Factors Pathway | 0.511 | 0.0104      | #NUM<br>! | CDH2,TGFB2           |
| Leukocyte Extravasation Signaling                                             | 0.509 | 0.0104      | #NUM<br>! | CRK,ITGB1            |
| PPAR $\alpha$ /RXR $\alpha$ Activation                                        | 0.509 | 0.0104      | #NUM<br>! | CAND1,TGFB2          |
| RAR Activation                                                                | 0.499 | 0.0102      | #NUM<br>! | CSNK2A1,TGFB2        |
| Role of PI3K/AKT Signaling in the Pathogenesis of Influenza                   | 0.495 | 0.0152      | #NUM<br>! | CRK                  |
| Pyridoxal 5'-phosphate Salvage Pathway                                        | 0.495 | 0.0152      | #NUM<br>! | FAM20B               |
| Nicotine Degradation II                                                       | 0.495 | 0.0152      | #NUM<br>! | B4GAT1               |
| Superpathway of Melatonin Degradation                                         | 0.495 | 0.0152      | #NUM<br>! | B4GAT1               |
| PI3K/AKT Signaling                                                            | 0.491 | 0.0101      | #NUM<br>! | CDC37,ITGB1          |
| Eicosanoid Signaling                                                          | 0.489 | 0.0149      | #NUM<br>! | LTA4H                |
| Serotonin Degradation                                                         | 0.484 | 0.0147      | #NUM<br>! | B4GAT1               |
| Cell Cycle: G1/S Checkpoint Regulation                                        | 0.484 | 0.0147      | #NUM<br>! | TGFB2                |
| SPINK1 General Cancer Pathway                                                 | 0.479 | 0.0145      | #NUM<br>! | 2210010C04Rik        |

# SUPPLEMENTARY DATA

|                                                                            |       |             |           |                        |
|----------------------------------------------------------------------------|-------|-------------|-----------|------------------------|
| Coronavirus Pathogenesis Pathway                                           | 0.479 | 0.0098<br>5 | #NUM<br>! | RPS4Y1,RPS6            |
| Growth Hormone Signaling                                                   | 0.469 | 0.0141      | #NUM<br>! | A2M                    |
| Glioma Invasiveness Signaling                                              | 0.458 | 0.0137      | #NUM<br>! | Cdc42                  |
| Heparan Sulfate Biosynthesis (Late Stages)                                 | 0.458 | 0.0137      | #NUM<br>! | PPME1                  |
| Leptin Signaling in Obesity                                                | 0.453 | 0.0135      | #NUM<br>! | GHRL                   |
| Agranulocyte Adhesion and Diapedesis                                       | 0.45  | 0.0093<br>5 | #NUM<br>! | ITGB1,MYH10            |
| ERK/MAPK Signaling                                                         | 0.45  | 0.0093<br>5 | #NUM<br>! | CRK,ITGB1              |
| Macropinocytosis Signaling                                                 | 0.445 | 0.0132      | #NUM<br>! | ITGB1                  |
| Calcium Signaling                                                          | 0.445 | 0.0092<br>6 | #NUM<br>! | ASPH,MYH10             |
| TREM1 Signaling                                                            | 0.44  | 0.013       | #NUM<br>! | ITGB1                  |
| Angiopoietin Signaling                                                     | 0.44  | 0.013       | #NUM<br>! | CRK                    |
| Dopamine Receptor Signaling                                                | 0.44  | 0.013       | #NUM<br>! | PCBD1                  |
| NF-κB Activation by Viruses                                                | 0.435 | 0.0128      | #NUM<br>! | ITGB1                  |
| Renal Cell Carcinoma Signaling                                             | 0.427 | 0.0125      | #NUM<br>! | CRK                    |
| Heparan Sulfate Biosynthesis                                               | 0.427 | 0.0125      | #NUM<br>! | PPME1                  |
| BEX2 Signaling Pathway                                                     | 0.423 | 0.0123      | #NUM<br>! | CDH2                   |
| TR/RXR Activation                                                          | 0.411 | 0.0119      | #NUM<br>! | LDLR                   |
| Cyclins and Cell Cycle Regulation                                          | 0.411 | 0.0119      | #NUM<br>! | TGFB2                  |
| VEGF Family Ligand-Receptor Interactions                                   | 0.411 | 0.0119      | #NUM<br>! | NRP1                   |
| FGF Signaling                                                              | 0.411 | 0.0119      | #NUM<br>! | CRK                    |
| HIPPO signaling                                                            | 0.407 | 0.0118      | #NUM<br>! | DLG1                   |
| Osteoarthritis Pathway                                                     | 0.401 | 0.0085<br>5 | #NUM<br>! | ITGB1,JAG1             |
| Xenobiotic Metabolism AHR Signaling Pathway                                | 0.399 | 0.0115      | #NUM<br>! | ALDH16A1               |
| Regulation Of The Epithelial Mesenchymal Transition In Development Pathway | 0.399 | 0.0115      | #NUM<br>! | JAG1                   |
| Cdc42 Signaling                                                            | 0.395 | 0.0072<br>3 | #NUM<br>! | ARPC4,CFL2,HLA-A,ITGB1 |
| Regulation of Cellular Mechanics by Calpain Protease                       | 0.391 | 0.0112      | #NUM<br>! | ITGB1                  |
| Tec Kinase Signaling                                                       | 0.39  | 0.0071<br>9 | #NUM<br>! | Cdc42,GNB2,GNB4,ITGB1  |
| Acute Myeloid Leukemia Signaling                                           | 0.384 | 0.011       | #NUM<br>! | IDH1                   |



## SUPPLEMENTARY DATA

|                                                            |       |             |        |                   |
|------------------------------------------------------------|-------|-------------|--------|-------------------|
| Crosstalk between Dendritic Cells and Natural Killer Cells | 0.384 | 0.011       | #NUM ! | HLA-A             |
| AMPK Signaling                                             | 0.384 | 0.0082<br>6 | #NUM ! | GNB2,GNB4         |
| IL-4 Signaling                                             | 0.38  | 0.0109      | #NUM ! | HLA-A             |
| Estrogen Receptor Signaling                                | 0.378 | 0.0074<br>3 | #NUM ! | CFL2,GNB2,GNB4    |
| Melanocyte Development and Pigmentation Signaling          | 0.374 | 0.0106      | #NUM ! | CRK               |
| TGF- $\beta$ Signaling                                     | 0.367 | 0.0104      | #NUM ! | TGFB2             |
| LPS/IL-1 Mediated Inhibition of RXR Function               | 0.364 | 0.0079<br>4 | #NUM ! | ALDH16A1,XPO1     |
| ATM Signaling                                              | 0.364 | 0.0103      | #NUM ! | CBX1              |
| Salvage Pathways of Pyrimidine Ribonucleotides             | 0.36  | 0.0102      | #NUM ! | FAM20B            |
| Sperm Motility                                             | 0.36  | 0.0078<br>7 | #NUM ! | GNB2,GNB4         |
| VEGF Signaling                                             | 0.357 | 0.0101      | #NUM ! | EIF2S3            |
| Hepatic Fibrosis Signaling Pathway                         | 0.355 | 0.0071<br>6 | #NUM ! | Cdc42,ITGB1,TGFB2 |
| Sumoylation Pathway                                        | 0.344 | 0.0097<br>1 | #NUM ! | Cdc42             |
| IGF-1 Signaling                                            | 0.341 | 0.0096<br>2 | #NUM ! | CSNK2A1           |
| Insulin Secretion Signaling Pathway                        | 0.333 | 0.0074<br>6 | #NUM ! | EIF2S3,EIF4G3     |
| Protein Ubiquitination Pathway                             | 0.321 | 0.0072<br>7 | #NUM ! | HLA-A,PSMC1       |
| Opioid Signaling Pathway                                   | 0.32  | 0.0072<br>5 | #NUM ! | GNB2,GNB4         |
| Airway Pathology in Chronic Obstructive Pulmonary Disease  | 0.302 | 0.0084<br>7 | #NUM ! | TGFB2             |
| Sphingosine-1-phosphate Signaling                          | 0.302 | 0.0084<br>7 | #NUM ! | Cdc42             |
| NGF Signaling                                              | 0.302 | 0.0084<br>7 | #NUM ! | CRK               |
| p38 MAPK Signaling                                         | 0.302 | 0.0084<br>7 | #NUM ! | TGFB2             |
| Cholecystokinin/Gastrin-mediated Signaling                 | 0.299 | 0.0084      | #NUM ! | Cdc42             |
| Th1 Pathway                                                | 0.292 | 0.0082      | #NUM ! | HLA-A             |
| LXR/RXR Activation                                         | 0.289 | 0.0081<br>3 | #NUM ! | LDLR              |
| Glioma Signaling                                           | 0.287 | 0.0080<br>6 | #NUM ! | IDH1              |
| Pancreatic Adenocarcinoma Signaling                        | 0.282 | 0.0079<br>4 | #NUM ! | TGFB2             |
| GP6 Signaling Pathway                                      | 0.28  | 0.0078<br>7 | #NUM ! | LAMA5             |

## SUPPLEMENTARY DATA

|                                                                                |       |             |           |                       |
|--------------------------------------------------------------------------------|-------|-------------|-----------|-----------------------|
| Phospholipase C Signaling                                                      | 0.277 | 0.0061<br>3 | #NUM<br>! | Cdc42,GNB2,GNB4,ITGB1 |
| HGF Signaling                                                                  | 0.268 | 0.0075<br>8 | #NUM<br>! | ITGB1                 |
| p70S6K Signaling                                                               | 0.268 | 0.0075<br>8 | #NUM<br>! | RPS6                  |
| Gα12/13 Signaling                                                              | 0.267 | 0.0075<br>2 | #NUM<br>! | CDH2                  |
| STAT3 Pathway                                                                  | 0.262 | 0.0074<br>1 | #NUM<br>! | TGFB2                 |
| Adipogenesis pathway                                                           | 0.262 | 0.0074<br>1 | #NUM<br>! | RBBP4                 |
| IL-12 Signaling and Production in Macrophages                                  | 0.26  | 0.0073<br>5 | #NUM<br>! | TGFB2                 |
| White Adipose Tissue Browning Pathway                                          | 0.26  | 0.0073<br>5 | #NUM<br>! | LDHA                  |
| Neuroinflammation Signaling Pathway                                            | 0.26  | 0.0063<br>5 | #NUM<br>! | HLA-A,TGFB2           |
| MSP-RON Signaling In Cancer Cells Pathway                                      | 0.256 | 0.0072<br>5 | #NUM<br>! | ITGB1                 |
| Iron homeostasis signaling pathway                                             | 0.254 | 0.0071<br>9 | #NUM<br>! | PCBP1                 |
| Insulin Receptor Signaling                                                     | 0.252 | 0.0071<br>4 | #NUM<br>! | CRK                   |
| Role of Macrophages, Fibroblasts and Endothelial Cells in Rheumatoid Arthritis | 0.246 | 0.0061<br>5 | #NUM<br>! | 2210010C04Rik,MIF     |
| Dilated Cardiomyopathy Signaling Pathway                                       | 0.24  | 0.0068<br>5 | #NUM<br>! | MYH10                 |
| Cellular Effects of Sildenafil (Viagra)                                        | 0.234 | 0.0067<br>1 | #NUM<br>! | MYH10                 |
| Factors Promoting Cardiogenesis in Vertebrates                                 | 0.231 | 0.0066<br>2 | #NUM<br>! | TGFB2                 |
| Role of Pattern Recognition Receptors in Recognition of Bacteria and Viruses   | 0.223 | 0.0064<br>1 | #NUM<br>! | TGFB2                 |
| Necroptosis Signaling Pathway                                                  | 0.22  | 0.0063<br>7 | #NUM<br>! | VDAC1                 |
| HOTAIR Regulatory Pathway                                                      | 0.21  | 0.0061<br>3 | #NUM<br>! | RBBP4                 |
| Mitochondrial Dysfunction                                                      | 0.2   | 0.0058<br>8 | #NUM<br>! | VDAC1                 |
| Glioblastoma Multiforme Signaling                                              | 0.199 | 0.0058<br>5 | #NUM<br>! | Cdc42                 |
| Glucocorticoid Receptor Signaling                                              | 0     | 0.0051<br>6 | #NUM<br>! | A2M,HLA-A,TGFB2       |
| NRF2-mediated Oxidative Stress Response                                        | 0     | 0.0042<br>2 | #NUM<br>! | CCT7                  |
| Hepatic Cholestasis                                                            | 0     | 0.0052<br>9 | #NUM<br>! | TGFB2                 |
| Erythropoietin Signaling Pathway                                               | 0     | 0.0056<br>5 | #NUM<br>! | TGFB2                 |
| CCR5 Signaling in Macrophages                                                  | 0     | 0.0041<br>9 | #NUM<br>! | GNB2,GNB4             |
| Calcium-induced T Lymphocyte Apoptosis                                         | 0     | 0.0022<br>8 | #NUM<br>! | HLA-A                 |

# SUPPLEMENTARY DATA

|                                                                       |   |             |           |                 |
|-----------------------------------------------------------------------|---|-------------|-----------|-----------------|
| Cytotoxic T Lymphocyte-mediated Apoptosis of Target Cells             | 0 | 0.0024<br>8 | #NUM<br>! | HLA-A           |
| IL-17 Signaling                                                       | 0 | 0.0053<br>5 | #NUM<br>! | TGFB2           |
| CTLA4 Signaling in Cytotoxic T Lymphocytes                            | 0 | 0.0021<br>9 | #NUM<br>! | HLA-A           |
| T Helper Cell Differentiation                                         | 0 | 0.0022<br>3 | #NUM<br>! | HLA-A           |
| CD28 Signaling in T Helper Cells                                      | 0 | 0.0040<br>4 | #NUM<br>! | ARPC4,HLA-A     |
| Dendritic Cell Maturation                                             | 0 | 0.0017<br>6 | #NUM<br>! | HLA-A           |
| iCOS-iCOSL Signaling in T Helper Cells                                | 0 | 0.0020<br>6 | #NUM<br>! | HLA-A           |
| CREB Signaling in Neurons                                             | 0 | 0.0049<br>8 | #NUM<br>! | GNB2,GNB4,TGFB2 |
| Type I Diabetes Mellitus Signaling                                    | 0 | 0.0020<br>5 | #NUM<br>! | HLA-A           |
| Allograft Rejection Signaling                                         | 0 | 0.0021<br>7 | #NUM<br>! | HLA-A           |
| Autoimmune Thyroid Disease Signaling                                  | 0 | 0.0023<br>2 | #NUM<br>! | HLA-A           |
| Graft-versus-Host Disease Signaling                                   | 0 | 0.0023<br>6 | #NUM<br>! | HLA-A           |
| Production of Nitric Oxide and Reactive Oxygen Species in Macrophages | 0 | 0.0052<br>4 | #NUM<br>! | Cdc42           |
| Communication between Innate and Adaptive Immune Cells                | 0 | 0.0021<br>1 | #NUM<br>! | HLA-A           |
| Altered T Cell and B Cell Signaling in Rheumatoid Arthritis           | 0 | 0.0021<br>3 | #NUM<br>! | HLA-A           |
| Regulation of IL-2 Expression in Activated and Anergic T Lymphocytes  | 0 | 0.0021<br>7 | #NUM<br>! | TGFB2           |
| Nur77 Signaling in T Lymphocytes                                      | 0 | 0.0020<br>4 | #NUM<br>! | HLA-A           |
| PKC $\theta$ Signaling in T Lymphocytes                               | 0 | 0.0018<br>7 | #NUM<br>! | HLA-A           |
| Antiproliferative Role of TOB in T Cell Signaling                     | 0 | 0.0024<br>8 | #NUM<br>! | TGFB2           |
| OX40 Signaling Pathway                                                | 0 | 0.0021<br>9 | #NUM<br>! | HLA-A           |
| Granulocyte Adhesion and Diapedesis                                   | 0 | 0.0052<br>9 | #NUM<br>! | ITGB1           |
| Xenobiotic Metabolism Signaling                                       | 0 | 0.0034<br>6 | #NUM<br>! | ALDH16A1        |
| B Cell Receptor Signaling                                             | 0 | 0.0051<br>5 | #NUM<br>! | CFL2            |
| NF- $\kappa$ B Signaling                                              | 0 | 0.0018<br>2 | #NUM<br>! | CSNK2A1         |
| T Cell Receptor Signaling                                             | 0 | 0.0033<br>8 | #NUM<br>! | HLA-A,ITGB1     |
| Autophagy                                                             | 0 | 0.0046<br>9 | #NUM<br>! | TGFB2           |
| T Cell Exhaustion Signaling Pathway                                   | 0 | 0.0018<br>4 | #NUM<br>! | HLA-A           |

# SUPPLEMENTARY DATA

|                                                          |   |             |           |             |
|----------------------------------------------------------|---|-------------|-----------|-------------|
| Systemic Lupus Erythematosus In T Cell Signaling Pathway | 0 | 0.0032<br>4 | #NUM<br>! | Cdc42,HLA-A |
| Systemic Lupus Erythematosus In B Cell Signaling Pathway | 0 | 0.0036<br>1 | #NUM<br>! | TGFB2       |
| Senescence Pathway                                       | 0 | 0.0033<br>7 | #NUM<br>! | TGFB2       |
| Xenobiotic Metabolism CAR Signaling Pathway              | 0 | 0.0052<br>9 | #NUM<br>! | ALDH16A1    |
| Xenobiotic Metabolism PXR Signaling Pathway              | 0 | 0.0052<br>1 | #NUM<br>! | ALDH16A1    |

Note: Applicable data are numbers of arteries with percentages in parentheses.

**Supplementary Tables 3.** IPA analyses on proteins completely unique to P15 EVs with P value < 0.05.

|                                                 | -log (p-value) | Ratio      | z-score   | Molecules                                                      |
|-------------------------------------------------|----------------|------------|-----------|----------------------------------------------------------------|
| Ingenuity Canonical Pathways                    |                |            |           |                                                                |
| Regulation of eIF4 and p70S6K Signaling         | 6.24           | 0.044<br>7 | #NUM<br>! | ITGA3,PABPC1,PPP2R2A,PPP2R2B,RPS10,RPS2,RP S24,RRAS            |
| Signaling by Rho Family GTPases                 | 4.94           | 0.029<br>9 | #NUM<br>! | CDH13,CDH8,GNAI2,IQGAP1,ITGA3,MYL9,ROCK1,RO CK2                |
| 14-3-3-mediated Signaling                       | 4.93           | 0.047<br>2 | #NUM<br>! | PDCD6IP,RRAS,TUBB2A,TUBB2B,YWHAB,YWHAQ                         |
| p70S6K Signaling                                | 4.84           | 0.045<br>5 | #NUM<br>! | GNAI2,PPP2R2A,PPP2R2B,RRAS,YWHAB,YWHAQ                         |
| Gα12/13 Signaling                               | 4.82           | 0.045<br>1 | #NUM<br>! | CDH13,CDH8,MYL9,ROCK1,ROCK2,RRAS                               |
| Chemokine Signaling                             | 4.77           | 0.062<br>5 | #NUM<br>! | CAMK2D,GNAI2,MPRIP,ROCK2,RRAS                                  |
| Iron homeostasis signaling pathway              | 4.71           | 0.043<br>2 | #NUM<br>! | ATP6V1D,ATP6V1H,CUL1,HBB,Hbb-b1,Hbb-b2                         |
| Thrombin Signaling                              | 4.68           | 0.033<br>3 | #NUM<br>! | CAMK2D,GNAI2,MPRIP,MYL9,ROCK1,ROCK2,RRAS                       |
| HIPPO signaling                                 | 4.65           | 0.058<br>8 | #NUM<br>! | CUL1,PPP2R2A,PPP2R2B,YWHAB,YWHAQ                               |
| ERK/MAPK Signaling                              | 4.63           | 0.032<br>7 | #NUM<br>! | ITGA3,PPP2R2A,PPP2R2B,RRAS,STAT1,YWHAB,YW HAQ                  |
| RhoGDI Signaling                                | 4.62           | 0.032<br>6 | #NUM<br>! | CDH13,CDH8,GNAI2,ITGA3,MYL9,ROCK1,ROCK2                        |
| Semaphorin Neuronal Repulsive Signaling Pathway | 4.51           | 0.039<br>7 | #NUM<br>! | ITGA3,MPRIP,MYL9,ROCK1,ROCK2,RRAS                              |
| Axonal Guidance Signaling                       | 4.48           | 0.019<br>8 | #NUM<br>! | ADAMTS7,EPHA5,GNAI2,ITGA3,MYL9,ROCK1,ROCK2 ,RRAS,TUBB2A,TUBB2B |
| Estrogen Receptor Signaling                     | 4.48           | 0.022<br>3 | #NUM<br>! | ATP5F1B,CARM1,GNAI2,MMP19,MPRIP,MYL9,ROCK1 ,ROCK2,RRAS         |
| Actin Cytoskeleton Signaling                    | 4.26           | 0.028<br>6 | #NUM<br>! | IQGAP1,ITGA3,MPRIP,MYL9,ROCK1,ROCK2,RRAS                       |
| PI3K/AKT Signaling                              | 3.84           | 0.030<br>2 | #NUM<br>! | ITGA3,PPP2R2A,PPP2R2B,RRAS,YWHAB,YWHAQ                         |
| Ephrin Receptor Signaling                       | 3.82           | 0.029<br>9 | #NUM<br>! | EPHA5,GNAI2,ITGA3,ROCK1,ROCK2,RRAS                             |

# SUPPLEMENTARY DATA

|                                                        |      |            |           |                                                     |
|--------------------------------------------------------|------|------------|-----------|-----------------------------------------------------|
| IL-8 Signaling                                         | 3.7  | 0.028<br>4 | #NUM<br>! | GNAI2,IQGAP1,MYL9,ROCK1,ROCK2,RRAS                  |
| Protein Kinase A Signaling                             | 3.7  | 0.019<br>9 | #NUM<br>! | CAMK2D,GNAI2,MYL9,PTPRK,ROCK1,ROCK2,YWHA<br>B,YWHAQ |
| mTOR Signaling                                         | 3.69 | 0.028<br>3 | #NUM<br>! | PPP2R2A,PPP2R2B,RPS10,RPS2,RPS24,RRAS               |
| CCR3 Signaling in Eosinophils                          | 3.69 | 0.037<br>! | #NUM<br>! | GNAI2,MPRIP,ROCK1,ROCK2,RRAS                        |
| Integrin Signaling                                     | 3.68 | 0.028<br>2 | #NUM<br>! | CAPN2,ITGA3,MPRIP,MYL9,ROCK1,RRAS                   |
| EIF2 Signaling                                         | 3.56 | 0.026<br>8 | #NUM<br>! | PABPC1,RPS10,RPS2,RPS24,RRAS,WARS1                  |
| Epithelial Adherens Junction<br>Signaling              | 3.37 | 0.031<br>6 | #NUM<br>! | IQGAP1,MYL9,RRAS,TUBB2A,TUBB2B                      |
| Actin Nucleation by ARP-WASP<br>Complex                | 3.28 | 0.043<br>! | #NUM<br>! | ITGA3,ROCK1,ROCK2,RRAS                              |
| CXCR4 Signaling                                        | 3.26 | 0.029<br>9 | #NUM<br>! | GNAI2,MYL9,ROCK1,ROCK2,RRAS                         |
| Germ Cell-Sertoli Cell Junction<br>Signaling           | 3.22 | 0.029<br>2 | #NUM<br>! | IQGAP1,ITGA3,RRAS,TUBB2A,TUBB2B                     |
| Apoptosis Signaling                                    | 3.1  | 0.038<br>5 | #NUM<br>! | CAPN2,LMNA,ROCK1,RRAS                               |
| Ephrin A Signaling                                     | 3.06 | 0.063<br>8 | #NUM<br>! | EPHA5,ROCK1,ROCK2                                   |
| Leukocyte Extravasation<br>Signaling                   | 2.98 | 0.025<br>9 | #NUM<br>! | GNAI2,ITGA3,MMP19,ROCK1,ROCK2                       |
| CDK5 Signaling                                         | 2.98 | 0.035<br>7 | #NUM<br>! | ITGA3,PPP2R2A,PPP2R2B,RRAS                          |
| Cell Cycle: G2/M DNA Damage<br>Checkpoint Regulation   | 2.98 | 0.06<br>!  | #NUM<br>! | CUL1,YWHAB,YWHAQ                                    |
| Synaptic Long Term Depression                          | 2.97 | 0.025<br>8 | #NUM<br>! | GNAI2,NPR3,PPP2R2A,PPP2R2B,RRAS                     |
| Gap Junction Signaling                                 | 2.93 | 0.025<br>3 | #NUM<br>! | GNAI2,NPR3,RRAS,TUBB2A,TUBB2B                       |
| Regulation of Actin-based<br>Motility by Rho           | 2.92 | 0.034<br>5 | #NUM<br>! | ITGA3,MPRIP,MYL9,ROCK1                              |
| RhoA Signaling                                         | 2.82 | 0.032<br>3 | #NUM<br>! | MPRIP,MYL9,ROCK1,ROCK2                              |
| Synaptogenesis Signaling<br>Pathway                    | 2.81 | 0.019<br>2 | #NUM<br>! | CAMK2D,CDH13,CDH8,EPHA5,PAFAH1B1,RRAS               |
| Remodeling of Epithelial<br>Adherens Junctions         | 2.6  | 0.044<br>1 | #NUM<br>! | IQGAP1,TUBB2A,TUBB2B                                |
| GM-CSF Signaling                                       | 2.56 | 0.042<br>9 | #NUM<br>! | CAMK2D,RRAS,STAT1                                   |
| ERK5 Signaling                                         | 2.53 | 0.041<br>7 | #NUM<br>! | RRAS,YWHAB,YWHAQ                                    |
| Ephrin B Signaling                                     | 2.53 | 0.041<br>7 | #NUM<br>! | GNAI2,ROCK1,ROCK2                                   |
| Necroptosis Signaling Pathway                          | 2.45 | 0.025<br>5 | #NUM<br>! | CAMK2D,CAPN2,STAT1,UBC                              |
| Cardiac Hypertrophy Signaling                          | 2.43 | 0.019<br>4 | #NUM<br>! | GNAI2,MYL9,ROCK1,ROCK2,RRAS                         |
| Phagosome Maturation                                   | 2.43 | 0.025<br>2 | #NUM<br>! | ATP6V1D,ATP6V1H,TUBB2A,TUBB2B                       |
| Inhibition of ARE-Mediated<br>mRNA Degradation Pathway | 2.41 | 0.024<br>8 | #NUM<br>! | PPP2R2A,PPP2R2B,YWHAB,YWHAQ                         |
| Asparagine Biosynthesis I                              | 2.4  | 1<br>!     | #NUM<br>! | ASNS                                                |
| Renal Cell Carcinoma Signaling                         | 2.4  | 0.037<br>5 | #NUM<br>! | RRAS,Ubb,UBC                                        |

## SUPPLEMENTARY DATA

|                                                                   |      |            |           |                                   |
|-------------------------------------------------------------------|------|------------|-----------|-----------------------------------|
| Cyclins and Cell Cycle Regulation                                 | 2.34 | 0.035<br>7 | #NUM<br>! | CUL1,PPP2R2A,PPP2R2B              |
| PEDF Signaling                                                    | 2.34 | 0.035<br>7 | #NUM<br>! | ROCK1,ROCK2,RRAS                  |
| Wnt/ $\beta$ -catenin Signaling                                   | 2.3  | 0.023<br>1 | #NUM<br>! | PPP2R2A,PPP2R2B,Ubb,UBC           |
| Regulation of Cellular Mechanics by Calpain Protease              | 2.27 | 0.033<br>7 | #NUM<br>! | CAPN2,ITGA3,RRAS                  |
| Erythropoietin Signaling Pathway                                  | 2.26 | 0.022<br>6 | #NUM<br>! | HBB,Hbb-b1,Hbb-b2,RRAS            |
| Ceramide Signaling                                                | 2.26 | 0.033<br>3 | #NUM<br>! | PPP2R2A,PPP2R2B,RRAS              |
| Xenobiotic Metabolism Signaling                                   | 2.23 | 0.017<br>3 | #NUM<br>! | CAMK2D,ESD,PPP2R2A,PPP2R2B,RRAS   |
| Hepatic Fibrosis Signaling Pathway                                | 2.19 | 0.014<br>3 | #NUM<br>! | GNAI2,ITGA3,MYL9,ROCK1,ROCK2,RRAS |
| VEGF Signaling                                                    | 2.14 | 0.030<br>3 | #NUM<br>! | ROCK1,ROCK2,RRAS                  |
| Formaldehyde Oxidation II (Glutathione-dependent)                 | 2.1  | 0.5        | #NUM<br>! | ESD                               |
| IGF-1 Signaling                                                   | 2.08 | 0.028<br>8 | #NUM<br>! | RRAS,YWHAB,YWHAQ                  |
| Coronavirus Pathogenesis Pathway                                  | 2.06 | 0.019<br>7 | #NUM<br>! | RPS10,RPS2,RPS24,STAT1            |
| Telomerase Signaling                                              | 2.05 | 0.028      | #NUM<br>! | PPP2R2A,PPP2R2B,RRAS              |
| Sertoli Cell-Sertoli Cell Junction Signaling                      | 2.03 | 0.019<br>4 | #NUM<br>! | ITGA3,RRAS,TUBB2A,TUBB2B          |
| Cell Cycle Regulation by BTG Family Proteins                      | 2.02 | 0.054<br>1 | #NUM<br>! | PPP2R2A,PPP2R2B                   |
| Role of MAPK Signaling in Promoting the Pathogenesis of Influenza | 2    | 0.026<br>8 | #NUM<br>! | ATP6V1D,ATP6V1H,RRAS              |
| Agranulocyte Adhesion and Diapedesis                              | 1.98 | 0.018<br>7 | #NUM<br>! | GNAI2,ITGA3,MMP19,MYL9            |
| FAK Signaling                                                     | 1.94 | 0.025<br>6 | #NUM<br>! | CAPN2,ITGA3,RRAS                  |
| PAK Signaling                                                     | 1.94 | 0.025<br>4 | #NUM<br>! | ITGA3,MYL9,RRAS                   |
| NGF Signaling                                                     | 1.94 | 0.025<br>4 | #NUM<br>! | ROCK1,ROCK2,RRAS                  |
| Cholecystokinin/Gastrin-mediated Signaling                        | 1.92 | 0.025<br>2 | #NUM<br>! | ROCK1,ROCK2,RRAS                  |
| Oncostatin M Signaling                                            | 1.9  | 0.046<br>5 | #NUM<br>! | RRAS,STAT1                        |
| Coronavirus Replication Pathway                                   | 1.86 | 0.044<br>4 | #NUM<br>! | TUBB2A,TUBB2B                     |
| Reelin Signaling in Neurons                                       | 1.86 | 0.023<br>8 | #NUM<br>! | CAMK2D,ITGA3,PAFAH1B1             |
| GABA Receptor Signaling                                           | 1.81 | 0.022<br>9 | #NUM<br>! | GNAI2,Ubb,UBC                     |
| AMPK Signaling                                                    | 1.8  | 0.016<br>5 | #NUM<br>! | GNAI2,PPP2R2A,PPP2R2B,RAB2A       |
| Rac Signaling                                                     | 1.75 | 0.021<br>7 | #NUM<br>! | IQGAP1,ITGA3,RRAS                 |
| G $\alpha$ i Signaling                                            | 1.75 | 0.021<br>7 | #NUM<br>! | GNAI2,NPR3,RRAS                   |
| MSP-RON Signaling In Cancer Cells Pathway                         | 1.75 | 0.021<br>7 | #NUM<br>! | RRAS,YWHAB,YWHAQ                  |
| Hereditary Breast Cancer Signaling                                | 1.72 | 0.021<br>1 | #NUM<br>! | RRAS,Ubb,UBC                      |

# SUPPLEMENTARY DATA

|                                                          |      |          |        |                                           |
|----------------------------------------------------------|------|----------|--------|-------------------------------------------|
| Endocannabinoid Cancer Inhibition Pathway                | 1.71 | 0.021    | #NUM ! | GNAI2,ROCK1,ROCK2                         |
| Creatine-phosphate Biosynthesis                          | 1.71 | 0.2      | #NUM ! | CKB                                       |
| Cardiac Hypertrophy Signaling (Enhanced)                 | 1.69 | 0.011 2  | #NUM ! | CAMK2D,GNAI2,ITGA3,ROCK1,ROCK2,RRAS       |
| Dilated Cardiomyopathy Signaling Pathway                 | 1.69 | 0.020 5  | #NUM ! | CAMK2D,LMNA,MYL9                          |
| Cellular Effects of Sildenafil (Viagra)                  | 1.67 | 0.020 1  | #NUM ! | MPRIP,MYL9,PABPC4                         |
| CNTF Signaling                                           | 1.67 | 0.035 1  | #NUM ! | RRAS,STAT1                                |
| Role of CHK Proteins in Cell Cycle Checkpoint Control    | 1.67 | 0.035 1  | #NUM ! | PPP2R2A,PPP2R2B                           |
| Factors Promoting Cardiogenesis in Vertebrates           | 1.65 | 0.019 9  | #NUM ! | CAMK2D,ROCK1,ROCK2                        |
| Colorectal Cancer Metastasis Signaling                   | 1.65 | 0.014 9  | #NUM ! | GNAI2,MMP19,RRAS,STAT1                    |
| PCP pathway                                              | 1.62 | 0.033 3  | #NUM ! | ROCK1,ROCK2                               |
| Protein Ubiquitination Pathway                           | 1.62 | 0.014 5  | #NUM ! | CUL1,HSPD1,Ubb,UBC                        |
| G-Protein Coupled Receptor Signaling                     | 1.61 | 0.014 5  | #NUM ! | CAMK2D,GNAI2,NPR3,RRAS                    |
| Semaphorin Signaling in Neurons                          | 1.6  | 0.032 3  | #NUM ! | ROCK1,ROCK2                               |
| Huntington's Disease Signaling                           | 1.59 | 0.014 2  | #NUM ! | ATP5F1B,CAPN2,Ubb,UBC                     |
| Thrombopoietin Signaling                                 | 1.59 | 0.031 7  | #NUM ! | RRAS,STAT1                                |
| HOTAIR Regulatory Pathway                                | 1.57 | 0.018 4  | #NUM ! | MMP19,ROCK1,ROCK2                         |
| Glucocorticoid Receptor Signaling                        | 1.55 | 0.010 3  | #NUM ! | ATP5F1B,KRT6B,KRT73,KRT75,RRAS,STAT1      |
| Mitotic Roles of Polo-Like Kinase                        | 1.55 | 0.030 3  | #NUM ! | PPP2R2A,PPP2R2B                           |
| Gαq Signaling                                            | 1.52 | 0.017 6  | #NUM ! | GNAI2,ROCK1,ROCK2                         |
| Breast Cancer Regulation by Stathmin1                    | 1.51 | 0.010 1  | #NUM ! | CAMK2D,PPP2R2A,PPP2R2B,RRAS,TUBB2A,TUBB2B |
| Senescence Pathway                                       | 1.51 | 0.013 5  | #NUM ! | CAPN2,PPP2R2A,PPP2R2B,RRAS                |
| Role of JAK1 and JAK3 in γC Cytokine Signaling           | 1.51 | 0.029 2  | #NUM ! | RRAS,STAT1                                |
| Cardiac β-adrenergic Signaling                           | 1.49 | 0.017 2  | #NUM ! | GNAI2,PPP2R2A,PPP2R2B                     |
| Melatonin Signaling                                      | 1.48 | 0.027 8  | #NUM ! | CAMK2D,GNAI2                              |
| Tight Junction Signaling                                 | 1.47 | 0.016 9  | #NUM ! | MYL9,PPP2R2A,PPP2R2B                      |
| Dopamine-DARPP32 Feedback in cAMP Signaling              | 1.45 | 0.016 6  | #NUM ! | GNAI2,PPP2R2A,PPP2R2B                     |
| Systemic Lupus Erythematosus In T Cell Signaling Pathway | 1.44 | 0.009 72 | #NUM ! | GNAI2,PPP2R2A,PPP2R2B,ROCK1,ROCK2,RRAS    |
| Antiproliferative Role of Somatostatin Receptor 2        | 1.42 | 0.026    | #NUM ! | NPR3,RRAS                                 |
| Dopamine Receptor Signaling                              | 1.42 | 0.026    | #NUM ! | PPP2R2A,PPP2R2B                           |
| NF-κB Activation by Viruses                              | 1.41 | 0.025 6  | #NUM ! | ITGA3,RRAS                                |

## SUPPLEMENTARY DATA

|                                                                                |      |            |           |                         |
|--------------------------------------------------------------------------------|------|------------|-----------|-------------------------|
| Toll-like Receptor Signaling                                                   | 1.41 | 0.025<br>6 | #NUM<br>! | Ubb,UBC                 |
| GNRH Signaling                                                                 | 1.41 | 0.016      | #NUM<br>! | CAMK2D,GNAI2,RRAS       |
| IL-3 Signaling                                                                 | 1.4  | 0.025<br>3 | #NUM<br>! | RRAS,STAT1              |
| FLT3 Signaling in Hematopoietic Progenitor Cells                               | 1.39 | 0.025      | #NUM<br>! | RRAS,STAT1              |
| Production of Nitric Oxide and Reactive Oxygen Species in Macrophages          | 1.39 | 0.015<br>7 | #NUM<br>! | PPP2R2A,PPP2R2B,STAT1   |
| Role of Macrophages, Fibroblasts and Endothelial Cells in Rheumatoid Arthritis | 1.39 | 0.012<br>3 | #NUM<br>! | CAMK2D,ROCK1,ROCK2,RRAS |
| BEX2 Signaling Pathway                                                         | 1.38 | 0.024<br>7 | #NUM<br>! | PPP2R2A,PPP2R2B         |
| JAK/Stat Signaling                                                             | 1.37 | 0.024<br>4 | #NUM<br>! | RRAS,STAT1              |
| ILK Signaling                                                                  | 1.35 | 0.015<br>2 | #NUM<br>! | MYL9,PPP2R2A,PPP2R2B    |
| Prolactin Signaling                                                            | 1.34 | 0.023<br>3 | #NUM<br>! | RRAS,STAT1              |
| PDGF Signaling                                                                 | 1.34 | 0.023<br>3 | #NUM<br>! | RRAS,STAT1              |
| HIF1 $\alpha$ Signaling                                                        | 1.3  | 0.014<br>4 | #NUM<br>! | CAMK2D,MMP19,RRAS       |
| Calcium Signaling                                                              | 1.26 | 0.013<br>9 | #NUM<br>! | CAMK2D,MYL9,TPM3        |
| Death Receptor Signaling                                                       | 1.25 | 0.020<br>8 | #NUM<br>! | LMNA,ROCK1              |
| ATM Signaling                                                                  | 1.24 | 0.020<br>6 | #NUM<br>! | PPP2R2A,PPP2R2B         |
| Role of NFAT in Cardiac Hypertrophy                                            | 1.24 | 0.013<br>6 | #NUM<br>! | CAMK2D,GNAI2,RRAS       |
| UVA-Induced MAPK Signaling                                                     | 1.24 | 0.020<br>4 | #NUM<br>! | RRAS,STAT1              |
| Apelin Cardiomyocyte Signaling Pathway                                         | 1.23 | 0.020<br>2 | #NUM<br>! | GNAI2,MYL9              |
| cAMP-mediated signaling                                                        | 1.2  | 0.013<br>1 | #NUM<br>! | CAMK2D,GNAI2,NPR3       |
| Dermatan Sulfate Degradation (Metazoa)                                         | 1.18 | 0.058<br>8 | #NUM<br>! | IDS                     |
| $\alpha$ -Adrenergic Signaling                                                 | 1.18 | 0.018<br>9 | #NUM<br>! | GNAI2,RRAS              |
| Paxillin Signaling                                                             | 1.16 | 0.018<br>5 | #NUM<br>! | ITGA3,RRAS              |
| Bladder Cancer Signaling                                                       | 1.11 | 0.017<br>2 | #NUM<br>! | MMP19,RRAS              |
| Role of Tissue Factor in Cancer                                                | 1.11 | 0.017<br>2 | #NUM<br>! | ITGA3,RRAS              |
| Neuregulin Signaling                                                           | 1.1  | 0.017<br>1 | #NUM<br>! | ITGA3,RRAS              |
| MSP-RON Signaling In Macrophages Pathway                                       | 1.1  | 0.017<br>1 | #NUM<br>! | RRAS,STAT1              |
| Renin-Angiotensin Signaling                                                    | 1.08 | 0.016<br>7 | #NUM<br>! | RRAS,STAT1              |
| IL-15 Production                                                               | 1.07 | 0.016<br>3 | #NUM<br>! | EPHA5,STAT1             |
| Endocannabinoid Developing Neuron Pathway                                      | 1.07 | 0.016<br>3 | #NUM<br>! | GNAI2,RRAS              |



## SUPPLEMENTARY DATA

|                                                            |       |             |           |                         |
|------------------------------------------------------------|-------|-------------|-----------|-------------------------|
| Glioma Signaling                                           | 1.06  | 0.016<br>1  | #NUM<br>! | CAMK2D,RRAS             |
| Insulin Secretion Signaling Pathway                        | 1.04  | 0.011<br>2  | #NUM<br>! | CAMK2D,PABPC1,STAT1     |
| IL-22 Signaling                                            | 1.04  | 0.041<br>7  | #NUM<br>! | STAT1                   |
| Synaptic Long Term Potentiation                            | 1.03  | 0.015<br>5  | #NUM<br>! | CAMK2D,RRAS             |
| G Beta Gamma Signaling                                     | 1.03  | 0.015<br>5  | #NUM<br>! | GNAI2,RRAS              |
| P2Y Purigenic Receptor Signaling Pathway                   | 1.03  | 0.015<br>5  | #NUM<br>! | GNAI2,RRAS              |
| Role of JAK family kinases in IL-6-type Cytokine Signaling | 1.02  | 0.04<br>!   | #NUM<br>! | STAT1                   |
| fMLP Signaling in Neutrophils                              | 1.02  | 0.015<br>3  | #NUM<br>! | GNAI2,RRAS              |
| HGF Signaling                                              | 1.01  | 0.015<br>2  | #NUM<br>! | ITGA3,RRAS              |
| Opioid Signaling Pathway                                   | 1.01  | 0.010<br>9  | #NUM<br>! | CAMK2D,GNAI2,RRAS       |
| Role of JAK1, JAK2 and TYK2 in Interferon Signaling        | 1.01  | 0.038<br>5  | #NUM<br>! | STAT1                   |
| Molecular Mechanisms of Cancer                             | 0.996 | 0.008<br>99 | #NUM<br>! | CAMK2D,GNAI2,ITGA3,RRAS |
| Apelin Endothelial Signaling Pathway                       | 0.975 | 0.014<br>4  | #NUM<br>! | GNAI2,RRAS              |
| PI3K Signaling in B Lymphocytes                            | 0.955 | 0.014<br>!  | #NUM<br>! | CAMK2D,RRAS             |
| Corticotropin Releasing Hormone Signaling                  | 0.928 | 0.013<br>4  | #NUM<br>! | GNAI2,NPR3              |
| PTEN Signaling                                             | 0.921 | 0.013<br>3  | #NUM<br>! | ITGA3,RRAS              |
| Relaxin Signaling                                          | 0.907 | 0.013<br>1  | #NUM<br>! | GNAI2,NPR3              |
| Role of JAK2 in Hormone-like Cytokine Signaling            | 0.896 | 0.029<br>4  | #NUM<br>! | STAT1                   |
| Pyrimidine Ribonucleotides Interconversion                 | 0.896 | 0.029<br>4  | #NUM<br>! | CANT1                   |
| IL-9 Signaling                                             | 0.886 | 0.028<br>6  | #NUM<br>! | STAT1                   |
| Pyrimidine Ribonucleotides De Novo Biosynthesis            | 0.873 | 0.027<br>8  | #NUM<br>! | CANT1                   |
| Interferon Signaling                                       | 0.873 | 0.027<br>8  | #NUM<br>! | STAT1                   |
| tRNA Charging                                              | 0.842 | 0.025<br>6  | #NUM<br>! | WARS1                   |
| Inhibition of Matrix Metalloproteases                      | 0.842 | 0.025<br>6  | #NUM<br>! | MMP19                   |
| Mechanisms of Viral Exit from Host Cells                   | 0.821 | 0.024<br>4  | #NUM<br>! | PDCD6IP                 |
| D-myo-inositol (1,4,5,6)-Tetrakisphosphate Biosynthesis    | 0.807 | 0.011<br>3  | #NUM<br>! | PPP2R2A,PPP2R2B         |
| D-myo-inositol (3,4,5,6)-tetrakisphosphate Biosynthesis    | 0.807 | 0.011<br>3  | #NUM<br>! | PPP2R2A,PPP2R2B         |
| Tumor Microenvironment Pathway                             | 0.799 | 0.011<br>2  | #NUM<br>! | MMP19,RRAS              |
| G Protein Signaling Mediated by Tubby                      | 0.793 | 0.022<br>7  | #NUM<br>! | GNAI2                   |
| Retinol Biosynthesis                                       | 0.793 | 0.022<br>7  | #NUM<br>! | ESD                     |

## SUPPLEMENTARY DATA

|                                                              |       |             |           |                            |
|--------------------------------------------------------------|-------|-------------|-----------|----------------------------|
| iNOS Signaling                                               | 0.767 | 0.021<br>3  | #NUM<br>! | STAT1                      |
| nNOS Signaling in Neurons                                    | 0.767 | 0.021<br>3  | #NUM<br>! | CAPN2                      |
| T Cell Exhaustion Signaling Pathway                          | 0.767 | 0.007<br>35 | #NUM<br>! | PPP2R2A,PPP2R2B,RRAS,STAT1 |
| 3-phosphoinositide Degradation                               | 0.762 | 0.010<br>6  | #NUM<br>! | PPP2R2A,PPP2R2B            |
| Granulocyte Adhesion and Diapedesis                          | 0.762 | 0.010<br>6  | #NUM<br>! | GNAI2,MMP19                |
| Xenobiotic Metabolism CAR Signaling Pathway                  | 0.762 | 0.010<br>6  | #NUM<br>! | PPP2R2A,PPP2R2B            |
| Apelin Muscle Signaling Pathway                              | 0.759 | 0.020<br>8  | #NUM<br>! | GNAI2                      |
| Endothelin-1 Signaling                                       | 0.754 | 0.010<br>5  | #NUM<br>! | GNAI2,RRAS                 |
| Spliceosomal Cycle                                           | 0.752 | 0.020<br>4  | #NUM<br>! | SF3B6                      |
| Xenobiotic Metabolism PXR Signaling Pathway                  | 0.752 | 0.010<br>4  | #NUM<br>! | CAMK2D,ESD                 |
| Cdc42 Signaling                                              | 0.75  | 0.007<br>23 | #NUM<br>! | IQGAP1,ITGA3,MPRIIP,MYL9   |
| Clathrin-mediated Endocytosis Signaling                      | 0.747 | 0.010<br>4  | #NUM<br>! | Ubb,UBC                    |
| D-myo-inositol-5-phosphate Metabolism                        | 0.747 | 0.010<br>4  | #NUM<br>! | PPP2R2A,PPP2R2B            |
| Hepatic Fibrosis / Hepatic Stellate Cell Activation          | 0.745 | 0.010<br>3  | #NUM<br>! | MYL9,STAT1                 |
| B Cell Receptor Signaling                                    | 0.745 | 0.010<br>3  | #NUM<br>! | CAMK2D,RRAS                |
| Melanoma Signaling                                           | 0.742 | 0.02<br>!   | #NUM<br>! | RRAS                       |
| UVC-Induced MAPK Signaling                                   | 0.735 | 0.019<br>6  | #NUM<br>! | RRAS                       |
| Amyloid Processing                                           | 0.735 | 0.019<br>6  | #NUM<br>! | CAPN2                      |
| Natural Killer Cell Signaling                                | 0.728 | 0.010<br>1  | #NUM<br>! | ROCK1,RRAS                 |
| Adrenomedullin signaling pathway                             | 0.728 | 0.010<br>1  | #NUM<br>! | NPR3,RRAS                  |
| 3-phosphoinositide Biosynthesis                              | 0.714 | 0.009<br>85 | #NUM<br>! | PPP2R2A,PPP2R2B            |
| EGF Signaling                                                | 0.706 | 0.018<br>2  | #NUM<br>! | STAT1                      |
| Cancer Drug Resistance By Drug Efflux                        | 0.686 | 0.017<br>2  | #NUM<br>! | RRAS                       |
| Autophagy                                                    | 0.684 | 0.009<br>39 | #NUM<br>! | PPP2R2A,PPP2R2B            |
| Endometrial Cancer Signaling                                 | 0.672 | 0.016<br>7  | #NUM<br>! | RRAS                       |
| SPINK1 Pancreatic Cancer Pathway                             | 0.672 | 0.016<br>7  | #NUM<br>! | CPA4                       |
| IL-2 Signaling                                               | 0.666 | 0.016<br>4  | #NUM<br>! | RRAS                       |
| Antiproliferative Role of TOB in T Cell Signaling            | 0.664 | 0.007<br>43 | #NUM<br>! | CUL1,PABPC1,PABPC4         |
| Activation of IRF by Cytosolic Pattern Recognition Receptors | 0.642 | 0.015<br>4  | #NUM<br>! | STAT1                      |
| ErbB2-ErbB3 Signaling                                        | 0.642 | 0.015<br>4  | #NUM<br>! | RRAS                       |

## SUPPLEMENTARY DATA

|                                                                                 |       |             |           |                        |
|---------------------------------------------------------------------------------|-------|-------------|-----------|------------------------|
| Role of PI3K/AKT Signaling in the Pathogenesis of Influenza                     | 0.636 | 0.015<br>2  | #NUM<br>! | GNAI2                  |
| ErbB4 Signaling                                                                 | 0.625 | 0.014<br>7  | #NUM<br>! | RRAS                   |
| Superpathway of Inositol Phosphate Compounds                                    | 0.625 | 0.008<br>58 | #NUM<br>! | PPP2R2A,PPP2R2B        |
| Cell Cycle: G1/S Checkpoint Regulation                                          | 0.625 | 0.014<br>7  | #NUM<br>! | CUL1                   |
| SPINK1 General Cancer Pathway                                                   | 0.62  | 0.014<br>5  | #NUM<br>! | RRAS                   |
| Agrin Interactions at Neuromuscular Junction                                    | 0.614 | 0.014<br>3  | #NUM<br>! | RRAS                   |
| Growth Hormone Signaling                                                        | 0.609 | 0.014<br>1  | #NUM<br>! | STAT1                  |
| Glioma Invasiveness Signaling                                                   | 0.599 | 0.013<br>7  | #NUM<br>! | RRAS                   |
| GPCR-Mediated Integration of Enteroendocrine Signaling Exemplified by an L Cell | 0.599 | 0.013<br>7  | #NUM<br>! | GNAI2                  |
| Caveolar-mediated Endocytosis Signaling                                         | 0.588 | 0.013<br>3  | #NUM<br>! | ITGA3                  |
| Phospholipase C Signaling                                                       | 0.585 | 0.006<br>13 | #NUM<br>! | ITGA3,MPRIIP,MYL9,RRAS |
| GDNF Family Ligand-Receptor Interactions                                        | 0.583 | 0.013<br>2  | #NUM<br>! | RRAS                   |
| Neurotrophin/TRK Signaling                                                      | 0.583 | 0.013<br>2  | #NUM<br>! | RRAS                   |
| Macropinocytosis Signaling                                                      | 0.583 | 0.013<br>2  | #NUM<br>! | RRAS                   |
| IL-15 Signaling                                                                 | 0.578 | 0.013       | #NUM<br>! | RRAS                   |
| Angiopoietin Signaling                                                          | 0.578 | 0.013       | #NUM<br>! | RRAS                   |
| Sperm Motility                                                                  | 0.573 | 0.007<br>87 | #NUM<br>! | EPHA5,GNAI2            |
| IL-7 Signaling Pathway                                                          | 0.573 | 0.012<br>8  | #NUM<br>! | STAT1                  |
| Thyroid Cancer Signaling                                                        | 0.569 | 0.012<br>7  | #NUM<br>! | RRAS                   |
| Estrogen-Dependent Breast Cancer Signaling                                      | 0.569 | 0.012<br>7  | #NUM<br>! | RRAS                   |
| Role of BRCA1 in DNA Damage Response                                            | 0.564 | 0.012<br>5  | #NUM<br>! | STAT1                  |
| Role of MAPK Signaling in the Pathogenesis of Influenza                         | 0.559 | 0.012<br>3  | #NUM<br>! | RRAS                   |
| VEGF Family Ligand-Receptor Interactions                                        | 0.545 | 0.011<br>9  | #NUM<br>! | RRAS                   |
| FcγRIIB Signaling in B Lymphocytes                                              | 0.542 | 0.011<br>8  | #NUM<br>! | RRAS                   |
| LPS-stimulated MAPK Signaling                                                   | 0.542 | 0.011<br>8  | #NUM<br>! | RRAS                   |
| Role of Hypercytokinemia/hyperchemok inemia in the Pathogenesis of Influenza    | 0.538 | 0.011<br>6  | #NUM<br>! | STAT1                  |
| Apelin Adipocyte Signaling Pathway                                              | 0.538 | 0.011<br>6  | #NUM<br>! | GNAI2                  |
| BMP signaling pathway                                                           | 0.533 | 0.011<br>5  | #NUM<br>! | RRAS                   |
| Systemic Lupus Erythematosus In B Cell Signaling Pathway                        | 0.521 | 0.007<br>22 | #NUM<br>! | RRAS,STAT1             |

## SUPPLEMENTARY DATA

|                                                             |       |             |        |                   |
|-------------------------------------------------------------|-------|-------------|--------|-------------------|
| Acute Myeloid Leukemia Signaling                            | 0.517 | 0.011       | #NUM ! | RRAS              |
| Crosstalk between Dendritic Cells and Natural Killer Cells  | 0.517 | 0.011       | #NUM ! | CAMK2D            |
| IL-4 Signaling                                              | 0.513 | 0.010<br>9  | #NUM ! | RRAS              |
| Melanocyte Development and Pigmentation Signaling           | 0.504 | 0.010<br>6  | #NUM ! | RRAS              |
| Non-Small Cell Lung Cancer Signaling                        | 0.504 | 0.010<br>6  | #NUM ! | RRAS              |
| IL-1 Signaling                                              | 0.504 | 0.010<br>6  | #NUM ! | GNAI2             |
| ErbB Signaling                                              | 0.504 | 0.010<br>6  | #NUM ! | RRAS              |
| TGF- $\beta$ Signaling                                      | 0.498 | 0.010<br>4  | #NUM ! | RRAS              |
| Neuropathic Pain Signaling In Dorsal Horn Neurons           | 0.479 | 0.009<br>9  | #NUM ! | CAMK2D            |
| NER (Nucleotide Excision Repair, Enhanced Pathway)          | 0.472 | 0.009<br>71 | #NUM ! | DDB1              |
| Virus Entry via Endocytic Pathways                          | 0.47  | 0.009<br>62 | #NUM ! | RRAS              |
| Mouse Embryonic Stem Cell Pluripotency                      | 0.47  | 0.009<br>62 | #NUM ! | RRAS              |
| Chronic Myeloid Leukemia Signaling                          | 0.46  | 0.009<br>35 | #NUM ! | RRAS              |
| PPAR Signaling                                              | 0.46  | 0.009<br>35 | #NUM ! | RRAS              |
| Oxidative Phosphorylation                                   | 0.452 | 0.009<br>17 | #NUM ! | ATP5F1B           |
| Prostate Cancer Signaling                                   | 0.444 | 0.008<br>93 | #NUM ! | RRAS              |
| Amyotrophic Lateral Sclerosis Signaling                     | 0.434 | 0.008<br>7  | #NUM ! | CAPN2             |
| GPCR-Mediated Nutrient Sensing in Enteroendocrine Cells     | 0.432 | 0.008<br>62 | #NUM ! | GNAI2             |
| Fc Epsilon RI Signaling                                     | 0.428 | 0.008<br>55 | #NUM ! | RRAS              |
| Sphingosine-1-phosphate Signaling                           | 0.426 | 0.008<br>47 | #NUM ! | GNAI2             |
| Neuroprotective Role of THOP1 in Alzheimer's Disease        | 0.426 | 0.008<br>47 | #NUM ! | HTRA3             |
| p38 MAPK Signaling                                          | 0.426 | 0.008<br>47 | #NUM ! | STAT1             |
| Role of NANOG in Mammalian Embryonic Stem Cell Pluripotency | 0.42  | 0.008<br>33 | #NUM ! | RRAS              |
| Tec Kinase Signaling                                        | 0.42  | 0.005<br>4  | #NUM ! | GNAI2,ITGA3,STAT1 |
| Gas Signaling                                               | 0.417 | 0.008<br>26 | #NUM ! | GNAI2             |
| Th1 Pathway                                                 | 0.415 | 0.008<br>2  | #NUM ! | STAT1             |
| Pancreatic Adenocarcinoma Signaling                         | 0.403 | 0.007<br>94 | #NUM ! | STAT1             |
| Ferroptosis Signaling Pathway                               | 0.403 | 0.007<br>94 | #NUM ! | RRAS              |
| IL-6 Signaling                                              | 0.398 | 0.007<br>81 | #NUM ! | RRAS              |

## SUPPLEMENTARY DATA

|                                                                               |       |             |           |                   |
|-------------------------------------------------------------------------------|-------|-------------|-----------|-------------------|
| STAT3 Pathway                                                                 | 0.38  | 0.007<br>41 | #NUM<br>! | RRAS              |
| IL-12 Signaling and Production in Macrophages                                 | 0.378 | 0.007<br>35 | #NUM<br>! | STAT1             |
| Role of PKR in Interferon Induction and Antiviral Response                    | 0.378 | 0.007<br>35 | #NUM<br>! | STAT1             |
| Insulin Receptor Signaling                                                    | 0.369 | 0.007<br>14 | #NUM<br>! | RRAS              |
| CREB Signaling in Neurons                                                     | 0.368 | 0.004<br>98 | #NUM<br>! | CAMK2D,GNAI2,RRAS |
| Xenobiotic Metabolism General Signaling Pathway                               | 0.362 | 0.006<br>99 | #NUM<br>! | RRAS              |
| Endocannabinoid Neuronal Synapse Pathway                                      | 0.353 | 0.006<br>8  | #NUM<br>! | GNAI2             |
| Phagosome Formation                                                           | 0.349 | 0.006<br>71 | #NUM<br>! | ITGA3             |
| NAD Signaling Pathway                                                         | 0.344 | 0.006<br>62 | #NUM<br>! | HSPD1             |
| Ovarian Cancer Signaling                                                      | 0.33  | 0.006<br>33 | #NUM<br>! | RRAS              |
| Aldosterone Signaling in Epithelial Cells                                     | 0.319 | 0.006<br>1  | #NUM<br>! | HSPD1             |
| Human Embryonic Stem Cell Pluripotency                                        | 0.314 | 0.006<br>02 | #NUM<br>! | GNAI2             |
| HMGB1 Signaling                                                               | 0.312 | 0.005<br>99 | #NUM<br>! | RRAS              |
| Androgen Signaling                                                            | 0.309 | 0.005<br>92 | #NUM<br>! | GNAI2             |
| Mitochondrial Dysfunction                                                     | 0.307 | 0.005<br>88 | #NUM<br>! | ATP5F1B           |
| Glioblastoma Multiforme Signaling                                             | 0.305 | 0.005<br>85 | #NUM<br>! | RRAS              |
| Th1 and Th2 Activation Pathway                                                | 0.304 | 0.005<br>81 | #NUM<br>! | STAT1             |
| Acute Phase Response Signaling                                                | 0.282 | 0.005<br>41 | #NUM<br>! | RRAS              |
| IL-17 Signaling                                                               | 0.279 | 0.005<br>35 | #NUM<br>! | RRAS              |
| Regulation Of The Epithelial Mesenchymal Transition By Growth Factors Pathway | 0.271 | 0.005<br>21 | #NUM<br>! | RRAS              |
| PPAR $\alpha$ /RXR $\alpha$ Activation                                        | 0.269 | 0.005<br>18 | #NUM<br>! | RRAS              |
| Regulation of the Epithelial-Mesenchymal Transition Pathway                   | 0.267 | 0.005<br>13 | #NUM<br>! | RRAS              |
| RAR Activation                                                                | 0.265 | 0.005<br>1  | #NUM<br>! | CARM1             |
| CTLA4 Signaling in Cytotoxic T Lymphocytes                                    | 0.265 | 0.004<br>39 | #NUM<br>! | PPP2R2A,PPP2R2B   |
| HER-2 Signaling in Breast Cancer                                              | 0.265 | 0.005<br>1  | #NUM<br>! | RRAS              |
| Regulation of IL-2 Expression in Activated and Anergic T Lymphocytes          | 0.26  | 0.004<br>34 | #NUM<br>! | PABPC4,RRAS       |
| Type I Diabetes Mellitus Signaling                                            | 0.237 | 0.004<br>11 | #NUM<br>! | HSPD1,STAT1       |
| Osteoarthritis Pathway                                                        | 0.216 | 0.004<br>27 | #NUM<br>! | ITGA3             |

## SUPPLEMENTARY DATA

|                                                   |       |             |           |             |
|---------------------------------------------------|-------|-------------|-----------|-------------|
| NRF2-mediated Oxidative Stress Response           | 0.213 | 0.004<br>22 | #NUM<br>! | RRAS        |
| Role of NFAT in Regulation of the Immune Response | 0     | 0.003<br>53 | #NUM<br>! | GNAI2,RRAS  |
| CCR5 Signaling in Macrophages                     | 0     | 0.002<br>1  | #NUM<br>! | GNAI2       |
| Calcium-induced T Lymphocyte Apoptosis            | 0     | 0.002<br>28 | #NUM<br>! | CAPN2       |
| T Helper Cell Differentiation                     | 0     | 0.002<br>23 | #NUM<br>! | STAT1       |
| Dendritic Cell Maturation                         | 0     | 0.001<br>76 | #NUM<br>! | STAT1       |
| iCOS-iCOSL Signaling in T Helper Cells            | 0     | 0.002<br>06 | #NUM<br>! | CAMK2D      |
| Systemic Lupus Erythematosus Signaling            | 0     | 0.003<br>34 | #NUM<br>! | LSM2,RRAS   |
| PKC $\theta$ Signaling in T Lymphocytes           | 0     | 0.003<br>73 | #NUM<br>! | CAMK2D,RRAS |
| SAPK/JNK Signaling                                | 0     | 0.002<br>08 | #NUM<br>! | RRAS        |
| NF- $\kappa$ B Signaling                          | 0     | 0.001<br>82 | #NUM<br>! | RRAS        |
| T Cell Receptor Signaling                         | 0     | 0.003<br>38 | #NUM<br>! | ITGA3,RRAS  |
| Sirtuin Signaling Pathway                         | 0     | 0.003<br>42 | #NUM<br>! | ATP5F1B     |
| Neuroinflammation Signaling Pathway               | 0     | 0.003<br>17 | #NUM<br>! | STAT1       |

**Supplementary Table 4.** A list of miRNAs found in P5 and P15 EVs.

| miR_name            | P5 EVs (Normalized) | P15 EVs (Normalized) | log2 (fold_change) | -LOG10 (p value) |
|---------------------|---------------------|----------------------|--------------------|------------------|
| hsa-miR-21-5p       | 12,738              | 4,062                | -1.65              | 256.0000         |
| hsa-miR-143-3p_R+1  | 3,256               | 3,084                | -0.08              | 211.8913         |
| hsa-miR-27b-3p      | 2,664               | 2,551                | -0.06              | 168.2356         |
| hsa-miR-125b-5p     | 2,129               | 10,210               | 2.26               | 256.0000         |
| hsa-miR-221-3p      | 1,951               | 7,283                | 1.90               | 142.5064         |
| hsa-miR-92a-3p      | 1,667               | 4,026                | 1.27               | 8.1280           |
| hsa-miR-100-5p      | 1,637               | 1,740                | 0.09               | 80.2324          |
| hsa-miR-22-3p       | 1,232               | 1,758                | 0.51               | 21.5989          |
| hsa-miR-222-3p_R+2  | 1,160               | 1,648                | 0.51               | 20.7474          |
| hsa-miR-27a-3p      | 1,080               | 993                  | -0.12              | 73.3398          |
| hsa-miR-10b-5p_R-1  | 911                 | 91                   | -3.32              | 256.0000         |
| hsa-miR-574-3p      | 886                 | 10,929               | 3.63               | 256.0000         |
| hsa-miR-23a-3p_R+1  | 884                 | 433                  | -1.03              | 256.0000         |
| hsa-miR-19b-3p      | 834                 | 22                   | -5.24              | 256.0000         |
| hsa-miR-145-5p      | 822                 | 3,082                | 1.91               | 59.7674          |
| hsa-miR-29a-3p_R-1  | 727                 | 1,167                | 0.68               | 6.5861           |
| hsa-miR-199a-5p     | 648                 | 652                  | 0.01               | 36.4892          |
| hsa-let-7i-5p       | 638                 | 705                  | 0.14               | 28.4481          |
| hsa-miR-26a-5p      | 618                 | 524                  | -0.24              | 49.1328          |
| hsa-miR-19a-3p      | 561                 | 8                    | -6.08              | 256.4894         |
| hsa-miR-125a-5p_R-1 | 535                 | 1,365                | 1.35               | 4.8748           |
| hsa-miR-99a-5p      | 494                 | 298                  | -0.73              | 64.5195          |
| hsa-let-7a-5p       | 476                 | 373                  | -0.35              | 43.3865          |
| hsa-let-7f-5p       | 460                 | 139                  | -1.73              | 107.5839         |
| hsa-miR-199a-3p_R-1 | 446                 | 547                  | 0.29               | 14.7124          |
| hsa-miR-24-3p_R+1   | 430                 | 233                  | -0.89              | 63.1291          |

## SUPPLEMENTARY DATA

|                         |     |       |       |          |
|-------------------------|-----|-------|-------|----------|
| hsa-miR-148a-3p         | 406 | 39    | -3.39 | 147.5019 |
| hsa-miR-17-5p           | 400 | 39    | -3.36 | 144.8215 |
| hsa-miR-106a-5p_1ss1AC  | 400 | 39    | -3.36 | 144.8215 |
| hsa-let-7g-5p           | 389 | 652   | 0.74  | 2.7357   |
| hsa-miR-30e-5p_R+2      | 385 | 204   | -0.92 | 58.0917  |
| hsa-miR-335-5p          | 368 | 313   | -0.23 | 29.4145  |
| hsa-miR-20a-5p          | 359 | 44    | -3.04 | 122.5801 |
| hsa-miR-99b-5p          | 355 | 1,237 | 1.80  | 19.6275  |
| hsa-miR-30d-5p_R+2      | 342 | 575   | 0.75  | 2.4183   |
| hsa-miR-146a-5p         | 308 | 12    | -4.66 | 130.1735 |
| PC-3p-9853_49           | 300 | 0     | -inf  | 145.5249 |
| hsa-miR-127-3p          | 291 | 4,728 | 4.02  | 256.0000 |
| hsa-miR-320a-3p         | 270 | 2,190 | 3.02  | 142.0282 |
| hsa-miR-26b-5p_R+1      | 265 | 98    | -1.43 | 54.5313  |
| hsa-miR-181a-5p         | 255 | 1,266 | 2.31  | 44.7892  |
| hsa-miR-23b-3p_R+1      | 242 | 127   | -0.93 | 37.2058  |
| hsa-miR-16-5p           | 227 | 103   | -1.13 | 39.8700  |
| hsa-miR-30a-5p_R+2      | 227 | 397   | 0.81  | 1.2215   |
| hsa-miR-191-5p          | 222 | 757   | 1.77  | 11.4670  |
| hsa-miR-363-3p_R-1      | 214 | 0     | -inf  | 103.7567 |
| hsa-miR-424-5p_R-1      | 205 | 16    | -3.71 | 78.1767  |
| hsa-let-7b-5p           | 205 | 1,032 | 2.33  | 37.4713  |
| hsa-let-7e-5p           | 201 | 85    | -1.24 | 37.5436  |
| hsa-miR-103a-3p         | 198 | 52    | -1.92 | 50.5732  |
| hsa-miR-1246_R+1        | 197 | 21    | -3.23 | 70.1281  |
| hsa-miR-31-5p_R+2       | 188 | 151   | -0.32 | 16.9645  |
| hsa-miR-20b-5p          | 180 | 0     | -inf  | 87.2550  |
| oga-miR-100_R+1         | 175 | 83    | -1.07 | 29.7067  |
| hsa-miR-423-3p          | 171 | 4,312 | 4.65  | 256.0000 |
| hsa-miR-199b-5p         | 163 | 118   | -0.46 | 17.3397  |
| hsa-miR-484             | 163 | 827   | 2.35  | 30.4865  |
| hsa-miR-30c-5p_R+1      | 154 | 290   | 0.91  | 0.4089   |
| hsa-let-7d-5p           | 141 | 62    | -1.18 | 25.8510  |
| hsa-miR-142-5p_L+2R-1   | 137 | 47    | -1.54 | 30.1646  |
| hsa-miR-214-3p          | 128 | 275   | 1.10  | 0.1487   |
| hsa-miR-152-3p          | 120 | 92    | -0.39 | 11.9165  |
| hsa-miR-93-5p           | 120 | 377   | 1.65  | 4.5259   |
| hsa-miR-1-3p            | 118 | 9     | -3.65 | 45.4655  |
| hsa-miR-181b-5p_R+1     | 109 | 283   | 1.38  | 1.4477   |
| hsa-miR-335-3p          | 107 | 84    | -0.35 | 10.2013  |
| hsa-miR-143-5p_R-1      | 94  | 67    | -0.49 | 10.4808  |
| hsa-miR-186-5p_R+1      | 94  | 149   | 0.66  | 1.2568   |
| hsa-miR-302a-5p_L-3R+2  | 94  | 0     | -inf  | 45.5446  |
| bta-miR-1246_L-1R+2     | 90  | 43    | -1.07 | 15.5055  |
| cgr-miR-1260            | 90  | 52    | -0.78 | 12.9518  |
| hsa-miR-30b-5p          | 90  | 92    | 0.03  | 5.4313   |
| hsa-miR-25-3p           | 90  | 220   | 1.29  | 0.7850   |
| hsa-miR-34a-5p          | 86  | 8     | -3.37 | 31.9783  |
| hsa-miR-151b_R+3        | 81  | 84    | 0.05  | 4.7160   |
| hsa-miR-365b-3p         | 79  | 59    | -0.44 | 8.3064   |
| hsa-miR-196a-5p         | 79  | 0     | -inf  | 38.2736  |
| oan-miR-16c-5p          | 77  | 4     | -4.14 | 31.7610  |
| hsa-miR-101-3p_R+1      | 77  | 20    | -1.94 | 20.2587  |
| hsa-miR-374a-5p         | 77  | 24    | -1.71 | 18.3513  |
| hsa-miR-15b-5p          | 77  | 48    | -0.67 | 10.3311  |
| efu-miR-9226_2ss4AG22GA | 77  | 66    | -0.23 | 6.6099   |
| hsa-miR-193a-5p         | 73  | 717   | 3.30  | 54.5106  |
| oan-miR-222b-3p_R+2     | 68  | 9     | -2.90 | 23.2576  |
| hsa-miR-130a-3p         | 68  | 28    | -1.27 | 13.5375  |

# SUPPLEMENTARY DATA

|                             |    |       |       |          |
|-----------------------------|----|-------|-------|----------|
| hsa-miR-128-3p              | 68 | 45    | -0.61 | 8.3960   |
| hsa-miR-140-3p_L-1R+2       | 68 | 308   | 2.17  | 9.6115   |
| hsa-miR-98-5p               | 64 | 34    | -0.91 | 10.1471  |
| hsa-miR-148b-3p             | 64 | 613   | 3.26  | 45.9636  |
| hsa-miR-193b-3p             | 64 | 963   | 3.91  | 94.5264  |
| hsa-miR-423-5p              | 60 | 951   | 3.99  | 95.8464  |
| hsa-miR-505-3p_L-1R+2       | 56 | 1,160 | 4.38  | 130.4698 |
| hsa-miR-302d-3p             | 54 | 0     | -inf  | 26.1580  |
| hsa-miR-133a-3p_L-1R+1      | 51 | 14    | -1.83 | 13.2728  |
| hsa-let-7c-5p               | 44 | 135   | 1.61  | 1.6857   |
| hsa-miR-15a-5p              | 43 | 12    | -1.86 | 11.1943  |
| hsa-let-7d-3p               | 43 | 652   | 3.93  | 64.4184  |
| hsa-miR-92b-3p              | 43 | 662   | 3.95  | 65.7766  |
| hsa-miR-196b-5p             | 43 | 0     | -inf  | 20.8279  |
| hsa-miR-499a-5p             | 43 | 0     | -inf  | 20.8279  |
| mdo-miR-22-3p               | 39 | 6     | -2.66 | 12.9814  |
| hsa-miR-340-5p              | 39 | 23    | -0.76 | 5.7285   |
| hsa-miR-4286_R+1            | 39 | 97    | 1.33  | 0.4428   |
| hsa-miR-106b-5p             | 34 | 6     | -2.59 | 10.8814  |
| hsa-miR-210-3p              | 34 | 39    | 0.20  | 1.7666   |
| hsa-miR-21-3p               | 34 | 77    | 1.18  | 0.1635   |
| hsa-miR-214-5p              | 34 | 194   | 2.50  | 8.9391   |
| mdo-miR-210-5p_L+1R-1       | 34 | 0     | -inf  | 16.4679  |
| hsa-miR-31-3p_R+1           | 30 | 4     | -2.93 | 10.5260  |
| mmu-miR-3968_L-3_1ss14AT    | 30 | 14    | -1.15 | 5.6511   |
| hsa-miR-361-5p              | 30 | 16    | -0.93 | 5.0072   |
| mmu-mir-6240-p3_1ss10TG     | 30 | 103   | 1.79  | 1.9095   |
| mmu-mir-6240-p3             | 30 | 110   | 1.88  | 2.4184   |
| hsa-miR-744-5p_R-1          | 30 | 183   | 2.61  | 9.1432   |
| hsa-miR-197-3p              | 30 | 388   | 3.70  | 35.4397  |
| hsa-miR-208a-3p             | 30 | 0     | -inf  | 14.5300  |
| PC-5p-480_1295              | 30 | 0     | -inf  | 14.5300  |
| PC-3p-43921_7               | 30 | 0     | -inf  | 14.5300  |
| hsa-miR-29b-3p              | 28 | 3     | -3.19 | 10.4039  |
| hsa-miR-374b-5p             | 26 | 12    | -1.12 | 4.8907   |
| hsa-miR-146b-5p_R+1         | 26 | 17    | -0.63 | 3.6164   |
| hsa-miR-155-5p_R-1          | 26 | 24    | -0.12 | 2.2180   |
| hsa-miR-185-5p              | 26 | 28    | 0.14  | 1.7001   |
| sha-miR-125a_R+2            | 26 | 44    | 0.78  | 0.3504   |
| hsa-miR-432-5p              | 26 | 690   | 4.75  | 84.3144  |
| hsa-miR-208b-3p             | 26 | 0     | -inf  | 12.5924  |
| oan-miR-15b-5p              | 26 | 0     | -inf  | 12.5924  |
| PC-5p-51899_6               | 26 | 0     | -inf  | 12.5924  |
| mmu-mir-6236-p3_1ss2AG      | 24 | 69    | 1.56  | 0.7342   |
| hsa-miR-4521_R+4            | 21 | 2     | -3.29 | 8.0932   |
| hsa-miR-18a-5p              | 21 | 3     | -2.81 | 7.3528   |
| hsa-miR-137-3p              | 21 | 11    | -0.97 | 3.7124   |
| hsa-miR-140-5p              | 21 | 16    | -0.44 | 2.5648   |
| hsa-miR-425-5p_R+2          | 21 | 23    | 0.09  | 1.2814   |
| hsa-let-7i-3p               | 21 | 50    | 1.22  | 0.2113   |
| bta-miR-2478_L-2            | 21 | 58    | 1.43  | 0.5515   |
| mmu-mir-6240-p5             | 21 | 115   | 2.42  | 5.2250   |
| hsa-miR-874-3p_R+1          | 21 | 151   | 2.82  | 9.0774   |
| hsa-miR-138-5p              | 19 | 69    | 1.83  | 1.5198   |
| hsa-miR-107_R-2             | 11 | 12    | 0.08  | 0.7438   |
| hsa-miR-450a-5p             | 11 | 6     | -0.86 | 2.0898   |
| bta-miR-11987_L-1_1ss8TA    | 11 | 12    | 0.11  | 0.7438   |
| hsa-miR-302a-3p_R-2_1ss19GA | 7  | 0     | -inf  | 3.3899   |
| hsa-miR-302b-3p_R-2         | 7  | 0     | -inf  | 3.3899   |



# SUPPLEMENTARY DATA

|                               |   |       |      |          |
|-------------------------------|---|-------|------|----------|
| hsa-miR-320c_R-1              | 4 | 36    | 3.09 | 2.9255   |
| hsa-miR-320b_R-2              | 4 | 103   | 4.59 | 12.7495  |
| hsa-miR-370-3p                | 0 | 1,531 | inf  | 265.5173 |
| bta-miR-2904_R+3_1ss1GC       | 0 | 1,121 | inf  | 194.0689 |
| hsa-miR-654-3p_R-2            | 0 | 1,066 | inf  | 184.4567 |
| bta-mir-2904-2-p3             | 0 | 974   | inf  | 168.4763 |
| hsa-miR-149-5p                | 0 | 842   | inf  | 145.6704 |
| hsa-miR-409-3p                | 0 | 601   | inf  | 103.7564 |
| hsa-miR-28-3p                 | 0 | 475   | inf  | 81.9217  |
| mmu-mir-6236-p5_1ss20GC       | 0 | 443   | inf  | 76.4694  |
| hsa-miR-493-5p                | 0 | 393   | inf  | 67.8290  |
| mmu-mir-6236-p5_1ss26GC       | 0 | 386   | inf  | 66.4488  |
| hsa-miR-328-3p                | 0 | 373   | inf  | 64.1621  |
| hsa-miR-1296-5p               | 0 | 329   | inf  | 56.7090  |
| mmu-mir-6236-p5_1ss25GC       | 0 | 323   | inf  | 55.5462  |
| hsa-miR-339-5p_R-1            | 0 | 252   | inf  | 43.2968  |
| hsa-miR-381-3p                | 0 | 252   | inf  | 43.2968  |
| hsa-miR-433-3p                | 0 | 239   | inf  | 41.0145  |
| mmu-mir-6236-p3               | 0 | 228   | inf  | 39.2274  |
| hsa-miR-134-5p                | 0 | 221   | inf  | 38.0810  |
| hsa-miR-485-3p                | 0 | 203   | inf  | 34.9151  |
| hsa-miR-345-5p                | 0 | 201   | inf  | 34.4232  |
| hsa-miR-1307-3p_R+1           | 0 | 186   | inf  | 31.9640  |
| hsa-miR-486-5p                | 0 | 175   | inf  | 30.1347  |
| hsa-miR-150-5p                | 0 | 159   | inf  | 27.1566  |
| hsa-miR-451a_R-1              | 0 | 154   | inf  | 26.5042  |
| hsa-miR-887-3p_R+2            | 0 | 150   | inf  | 25.8195  |
| hsa-miR-10a-5p_R-1            | 0 | 150   | inf  | 25.8194  |
| ssc-mir-1285-p3_1ss24TA       | 0 | 137   | inf  | 23.5576  |
| mmu-mir-6240-p5_1ss12AG_2     | 0 | 131   | inf  | 22.4253  |
| mmu-mir-6240-p3_1ss12AG       | 0 | 131   | inf  | 22.4253  |
| hsa-miR-126-3p_1ss22GA        | 0 | 130   | inf  | 22.1741  |
| hsa-miR-378a-3p               | 0 | 128   | inf  | 21.9755  |
| hsa-miR-543                   | 0 | 125   | inf  | 21.5039  |
| hsa-miR-223-3p                | 0 | 118   | inf  | 20.1463  |
| hsa-miR-431-3p                | 0 | 117   | inf  | 19.8862  |
| hsa-miR-224-5p_L-1R-2         | 0 | 117   | inf  | 19.8862  |
| hsa-miR-409-5p                | 0 | 117   | inf  | 19.8862  |
| hsa-miR-487b-3p               | 0 | 115   | inf  | 19.7061  |
| bta-mir-2887-1-p5_1ss15AT     | 0 | 108   | inf  | 18.5578  |
| bta-mir-2887-1-p3_1ss15AT     | 0 | 108   | inf  | 18.5578  |
| hsa-miR-940                   | 0 | 109   | inf  | 18.5379  |
| hsa-miR-145-3p                | 0 | 109   | inf  | 18.5379  |
| hsa-miR-125b-1-3p_R-1_1ss21CT | 0 | 106   | inf  | 18.1121  |
| bta-mir-2887-1-p3_1ss11AT     | 0 | 105   | inf  | 17.8627  |
| hsa-miR-1271-5p               | 0 | 100   | inf  | 17.1876  |
| hsa-miR-503-5p_R-1            | 0 | 98    | inf  | 16.7526  |
| hsa-miR-342-3p_R+1            | 0 | 97    | inf  | 16.5099  |
| mmu-mir-6240-p3_1ss25GT       | 0 | 97    | inf  | 16.5099  |
| hsa-miR-493-3p                | 0 | 97    | inf  | 16.5099  |
| hsa-miR-665_R-2               | 0 | 97    | inf  | 16.5099  |
| hsa-miR-574-5p                | 0 | 89    | inf  | 15.1543  |
| mmu-mir-6240-p5_1ss12AG_1     | 0 | 87    | inf  | 14.9257  |
| hsa-miR-106b-3p               | 0 | 88    | inf  | 14.8989  |
| hsa-miR-93-3p_R+1             | 0 | 86    | inf  | 14.7087  |
| mmu-mir-6236-p3_1ss22GC       | 0 | 80    | inf  | 13.5471  |
| hsa-miR-331-3p_R+1            | 0 | 75    | inf  | 12.8702  |
| hsa-miR-424-3p                | 0 | 75    | inf  | 12.8702  |
| hsa-miR-136-3p                | 0 | 73    | inf  | 12.4348  |

## SUPPLEMENTARY DATA

|                               |   |    |     |         |
|-------------------------------|---|----|-----|---------|
| hsa-miR-1260b_1ss9AG          | 0 | 68 | inf | 11.5137 |
| hsa-miR-656-3p                | 0 | 67 | inf | 11.2551 |
| hsa-miR-200b-3p_R+1           | 0 | 65 | inf | 11.0713 |
| hsa-miR-324-3p_L-3R+1         | 0 | 64 | inf | 10.8344 |
| hsa-miR-151a-3p               | 0 | 61 | inf | 10.3887 |
| hsa-miR-329-3p                | 0 | 61 | inf | 10.3887 |
| hsa-miR-130b-5p_R+1           | 0 | 58 | inf | 9.9214  |
| hsa-miR-487a-5p               | 0 | 58 | inf | 9.9214  |
| mmu-mir-6236-p3_1ss8AG        | 0 | 56 | inf | 9.4737  |
| hsa-miR-1180-3p               | 0 | 55 | inf | 9.2239  |
| hsa-miR-99b-3p_R+1            | 0 | 52 | inf | 8.7923  |
| hsa-miR-3615_R+2              | 0 | 50 | inf | 8.5496  |
| mmu-mir-6240-p5_1ss22GT       | 0 | 49 | inf | 8.3374  |
| mmu-mir-6240-p3_1ss19GT       | 0 | 49 | inf | 8.3374  |
| mmu-mir-6240-p5_1ss13AG       | 0 | 48 | inf | 8.1101  |
| hsa-miR-671-3p                | 0 | 48 | inf | 8.1101  |
| bta-mir-2887-1-p5_1ss21AT     | 0 | 45 | inf | 7.6525  |
| hsa-miR-323a-3p_L+1           | 0 | 45 | inf | 7.6525  |
| hsa-miR-330-3p                | 0 | 45 | inf | 7.6525  |
| hsa-miR-1307-5p_R+2           | 0 | 46 | inf | 7.6022  |
| hsa-miR-500a-3p               | 0 | 46 | inf | 7.6022  |
| hsa-miR-889-3p                | 0 | 44 | inf | 7.4272  |
| hsa-miR-425-3p                | 0 | 43 | inf | 7.1848  |
| hsa-miR-154-5p                | 0 | 43 | inf | 7.1848  |
| hsa-miR-377-5p                | 0 | 41 | inf | 6.9670  |
| hsa-miR-122-5p_R-1            | 0 | 42 | inf | 6.9242  |
| hsa-miR-1185-1-3p             | 0 | 39 | inf | 6.5032  |
| hsa-miR-221-5p_R+1            | 0 | 39 | inf | 6.5032  |
| hsa-miR-369-3p                | 0 | 37 | inf | 6.2810  |
| mmu-miR-1983                  | 0 | 38 | inf | 6.2449  |
| hsa-miR-589-5p_R-1            | 0 | 38 | inf | 6.2449  |
| hsa-miR-410-3p                | 0 | 36 | inf | 6.0591  |
| hsa-miR-483-3p_L-1R+2         | 0 | 36 | inf | 6.0590  |
| hsa-miR-132-3p                | 0 | 35 | inf | 5.8206  |
| hsa-miR-323b-3p_R-1           | 0 | 35 | inf | 5.8206  |
| hsa-miR-24-2-5p_L+1           | 0 | 33 | inf | 5.5944  |
| hsa-miR-182-5p_R+1_1ss24TC    | 0 | 33 | inf | 5.5944  |
| mmu-mir-6236-p5_1ss8CG        | 0 | 33 | inf | 5.5944  |
| bta-miR-150_1ss9CT            | 0 | 33 | inf | 5.5943  |
| hsa-miR-337-3p_L-1            | 0 | 34 | inf | 5.5644  |
| hsa-miR-652-3p_R+1            | 0 | 34 | inf | 5.5644  |
| hsa-miR-758-3p_R-1            | 0 | 34 | inf | 5.5644  |
| hsa-miR-193b-5p               | 0 | 32 | inf | 5.3737  |
| hsa-miR-339-3p                | 0 | 32 | inf | 5.3737  |
| hsa-miR-184_R-2               | 0 | 31 | inf | 5.1368  |
| hsa-miR-10401-3p_L+1R-1       | 0 | 31 | inf | 5.1368  |
| bta-mir-2887-1-p5_1ss18AT     | 0 | 31 | inf | 5.1368  |
| hsa-let-7b-3p_1ss22CT         | 0 | 29 | inf | 4.9070  |
| hsa-miR-125b-2-3p_L-2R+2      | 0 | 29 | inf | 4.9070  |
| hsa-miR-183-5p_L-1R+1         | 0 | 29 | inf | 4.9070  |
| hsa-miR-7706_R-1              | 0 | 30 | inf | 4.8825  |
| pal-miR-9993a-3p_1ss11GA      | 0 | 30 | inf | 4.8825  |
| hsa-mir-1285-1-p5             | 0 | 28 | inf | 4.6873  |
| hsa-miR-323a-5p               | 0 | 28 | inf | 4.6873  |
| hsa-miR-3117-3p_L-1R+2_1ss4GA | 0 | 28 | inf | 4.6873  |
| hsa-miR-3200-3p_R+1           | 0 | 28 | inf | 4.6873  |
| hsa-miR-487b-5p               | 0 | 25 | inf | 4.2188  |
| hsa-miR-142-3p_L-1            | 0 | 26 | inf | 4.1989  |
| hsa-miR-615-3p                | 0 | 26 | inf | 4.1989  |

# SUPPLEMENTARY DATA

|                         |   |    |     |        |
|-------------------------|---|----|-----|--------|
| hsa-miR-539-3p          | 0 | 24 | inf | 3.9997 |
| hsa-miR-618             | 0 | 23 | inf | 3.7649 |
| hsa-miR-769-5p          | 0 | 23 | inf | 3.7649 |
| hsa-miR-7977_1ss6AG     | 0 | 23 | inf | 3.7649 |
| hsa-miR-139-5p          | 0 | 23 | inf | 3.7649 |
| hsa-miR-369-5p_R-1      | 0 | 21 | inf | 3.5297 |
| mmu-miR-146a-5p_R+1     | 0 | 21 | inf | 3.5297 |
| hsa-miR-760_R+2         | 0 | 22 | inf | 3.5133 |
| eca-mir-8986a-p5_1ss1GA | 0 | 22 | inf | 3.5133 |
| hsa-miR-9-5p            | 0 | 20 | inf | 3.3107 |
| hsa-miR-361-3p          | 0 | 20 | inf | 3.3106 |
| bta-miR-150             | 0 | 20 | inf | 3.3106 |
| hsa-miR-455-3p_R+1      | 0 | 19 | inf | 3.0760 |
| hsa-miR-7704_R-1        | 0 | 19 | inf | 3.0760 |
| ssc-mir-1285-p5         | 0 | 19 | inf | 3.0760 |
| bta-miR-4286_R+2        | 0 | 19 | inf | 3.0760 |
| hsa-let-7e-3p           | 0 | 19 | inf | 3.0760 |
| hsa-miR-377-3p          | 0 | 19 | inf | 3.0760 |
| hsa-miR-532-5p          | 0 | 17 | inf | 2.8392 |
| hsa-miR-655-3p          | 0 | 17 | inf | 2.8392 |
| hsa-miR-1306-5p         | 0 | 17 | inf | 2.8392 |
| hsa-miR-1343-3p         | 0 | 17 | inf | 2.8392 |
| hsa-miR-296-5p          | 0 | 17 | inf | 2.8392 |
| hsa-miR-668-3p_R+1      | 0 | 17 | inf | 2.8392 |
| mmu-miR-7689-3p         | 0 | 17 | inf | 2.8392 |
| hsa-miR-125a-3p_R-1     | 0 | 18 | inf | 2.8251 |
| cgr-miR-1260_R+4        | 0 | 18 | inf | 2.8251 |
| hsa-miR-16-2-3p_L+1R-1  | 0 | 18 | inf | 2.8251 |
| hsa-miR-34c-5p          | 0 | 18 | inf | 2.8251 |
| hsa-miR-485-5p_R+1      | 0 | 16 | inf | 2.6194 |
| hsa-miR-2110_R-1        | 0 | 16 | inf | 2.6194 |
| hsa-miR-671-5p_R+1      | 0 | 16 | inf | 2.6194 |
| hsa-miR-130b-3p         | 0 | 15 | inf | 2.3841 |
| hsa-miR-185-3p_R-1      | 0 | 15 | inf | 2.3841 |
| oan-let-7e-5p           | 0 | 15 | inf | 2.3841 |
| cgr-miR-1260_R+2_3      | 0 | 15 | inf | 2.3841 |
| cgr-miR-1260_R+2_2      | 0 | 15 | inf | 2.3841 |
| cgr-miR-1260_R+2_1      | 0 | 15 | inf | 2.3841 |
| ssc-mir-4332-p5_1ss16CA | 0 | 13 | inf | 2.1466 |
| ssc-mir-4332-p5_1ss12CA | 0 | 13 | inf | 2.1466 |
| hsa-miR-22-5p           | 0 | 13 | inf | 2.1466 |
| hsa-miR-299-3p          | 0 | 13 | inf | 2.1466 |
| hsa-miR-532-3p          | 0 | 13 | inf | 2.1466 |
| hsa-miR-877-5p_R+2      | 0 | 13 | inf | 2.1466 |
| mmu-mir-1983-p5_1ss1GA  | 0 | 13 | inf | 2.1466 |
| hsa-miR-502-3p_R+1      | 0 | 14 | inf | 2.1332 |
| hsa-miR-941             | 0 | 14 | inf | 2.1332 |
| hsa-miR-99a-3p_R+1      | 0 | 14 | inf | 2.1332 |
| hsa-miR-365b-5p_L+1     | 0 | 14 | inf | 2.1332 |
| hsa-let-7a-3p_R+1       | 0 | 12 | inf | 1.9249 |
| hsa-miR-224-3p_L-1      | 0 | 12 | inf | 1.9249 |
| cja-mir-3135-p3_1ss11CA | 0 | 12 | inf | 1.9249 |
| hsa-miR-501-3p          | 0 | 12 | inf | 1.9249 |
| hsa-miR-675-3p_R+2      | 0 | 12 | inf | 1.9249 |
| mmu-mir-6236-p5_1ss3CG  | 0 | 12 | inf | 1.9249 |
| hsa-miR-27a-5p          | 0 | 11 | inf | 1.6876 |
| hsa-miR-494-3p_R+1      | 0 | 11 | inf | 1.6876 |
| hsa-miR-3187-3p         | 0 | 11 | inf | 1.6876 |
| mml-miR-7170-3p_L+2     | 0 | 11 | inf | 1.6876 |

# SUPPLEMENTARY DATA

|                          |   |    |     |        |
|--------------------------|---|----|-----|--------|
| PC-5p-41351_8            | 0 | 11 | inf | 1.6876 |
| hsa-miR-30a-3p           | 0 | 11 | inf | 1.6876 |
| hsa-miR-129-5p           | 0 | 11 | inf | 1.6876 |
| hsa-miR-337-5p_R-1       | 0 | 11 | inf | 1.6876 |
| hsa-miR-382-5p           | 0 | 11 | inf | 1.6876 |
| hsa-miR-450b-5p_R-1      | 0 | 11 | inf | 1.6876 |
| hsa-miR-654-5p           | 0 | 11 | inf | 1.6876 |
| hsa-miR-1468-5p_R+1      | 0 | 11 | inf | 1.6876 |
| bta-miR-339a_R+1         | 0 | 11 | inf | 1.6876 |
| cgr-miR-1260_R+1         | 0 | 11 | inf | 1.6876 |
| hsa-miR-138-1-3p_L+2R-1  | 0 | 9  | inf | 1.4503 |
| hsa-miR-192-5p           | 0 | 9  | inf | 1.4503 |
| hsa-miR-194-5p           | 0 | 9  | inf | 1.4503 |
| hsa-miR-365a-5p_R-1      | 0 | 9  | inf | 1.4503 |
| hsa-miR-1185-2-3p        | 0 | 9  | inf | 1.4503 |
| hsa-miR-1303             | 0 | 9  | inf | 1.4503 |
| mmu-miR-326-3p           | 0 | 9  | inf | 1.4503 |
| PC-5p-20333_21           | 0 | 9  | inf | 1.4503 |
| PC-3p-30410_12           | 0 | 9  | inf | 1.4503 |
| hsa-miR-18a-3p           | 0 | 9  | inf | 1.4503 |
| hsa-miR-92b-5p_R+2       | 0 | 9  | inf | 1.4503 |
| hsa-miR-411-5p           | 0 | 9  | inf | 1.4503 |
| hsa-miR-1260a_R+3_1ss9TG | 0 | 9  | inf | 1.4503 |
| hsa-miR-2277-5p_R-1      | 0 | 9  | inf | 1.4503 |
| hsa-miR-4746-5p          | 0 | 9  | inf | 1.4503 |
| mmu-let-7j_1ss8TG        | 0 | 9  | inf | 1.4503 |
| hsa-miR-200a-3p_R+1      | 0 | 10 | inf | 1.4356 |
| hsa-miR-324-5p_R+1       | 0 | 10 | inf | 1.4356 |
| cja-mir-367-p3           | 0 | 10 | inf | 1.4356 |
| PC-3p-44144_7            | 0 | 10 | inf | 1.4356 |
| hsa-miR-205-5p_R-3       | 0 | 10 | inf | 1.4356 |
| mml-miR-218-1-3p_L+4R-2  | 0 | 10 | inf | 1.4356 |
| hsa-miR-28-5p            | 0 | 8  | inf | 1.2242 |
| hsa-miR-126-5p           | 0 | 8  | inf | 1.2242 |
| hsa-miR-144-5p           | 0 | 8  | inf | 1.2242 |
| hsa-miR-320d_R-1         | 0 | 8  | inf | 1.2242 |
| hsa-miR-3909             | 0 | 8  | inf | 1.2242 |
| mmu-miR-155-5p_R+1       | 0 | 8  | inf | 1.2242 |
| hsa-miR-181a-2-3p        | 0 | 8  | inf | 1.2242 |
| hsa-miR-4326_R+4         | 0 | 8  | inf | 1.2242 |
| hsa-miR-6511a-3p         | 0 | 8  | inf | 1.2242 |
| cgr-mir-1285-p3_1ss2TC   | 0 | 8  | inf | 1.2242 |
| hsa-miR-23a-5p_R-1       | 0 | 7  | inf | 0.9823 |
| hsa-miR-30e-3p_1ss22CT   | 0 | 7  | inf | 0.9823 |
| hsa-miR-203a-3p_R+1      | 0 | 7  | inf | 0.9823 |
| hsa-miR-766-3p           | 0 | 7  | inf | 0.9823 |
| hsa-mir-770-p3_1ss23CT   | 0 | 7  | inf | 0.9823 |
| cgr-mir-1285-p5_1ss7TC   | 0 | 7  | inf | 0.9823 |
| hsa-miR-15b-3p_R-1       | 0 | 7  | inf | 0.9823 |
| hsa-miR-127-5p           | 0 | 7  | inf | 0.9823 |
| hsa-miR-383-5p           | 0 | 7  | inf | 0.9823 |
| hsa-miR-509-3-5p         | 0 | 7  | inf | 0.9823 |
| hsa-mir-619-p5_1ss2GT    | 0 | 7  | inf | 0.9823 |
| hsa-mir-7851-p5_1ss12TG  | 0 | 7  | inf | 0.9823 |
| hsa-miR-32-5p_R-1        | 0 | 5  | inf | 0.7453 |
| hsa-miR-3679-5p          | 0 | 5  | inf | 0.7453 |
| hsa-miR-12136_R+8        | 0 | 5  | inf | 0.7453 |
| bta-mir-2887-1-p3_1ss5CA | 0 | 5  | inf | 0.7453 |
| PC-3p-29366_13           | 0 | 5  | inf | 0.7453 |

# SUPPLEMENTARY DATA

|                                |   |   |     |        |
|--------------------------------|---|---|-----|--------|
| PC-5p-29949_12                 | 0 | 5 | inf | 0.7453 |
| hsa-miR-210-5p                 | 0 | 5 | inf | 0.7453 |
| hsa-miR-380-3p_R-1             | 0 | 5 | inf | 0.7453 |
| hsa-miR-411-3p_R-1             | 0 | 5 | inf | 0.7453 |
| hsa-miR-2277-3p_R+1            | 0 | 5 | inf | 0.7453 |
| PC-3p-32430_11                 | 0 | 5 | inf | 0.7453 |
| PC-3p-33077_11                 | 0 | 5 | inf | 0.7453 |
| PC-5p-33194_11                 | 0 | 5 | inf | 0.7453 |
| hsa-miR-129-2-3p               | 0 | 6 | inf | 0.7281 |
| hsa-miR-144-3p                 | 0 | 6 | inf | 0.7281 |
| hsa-miR-496_R-1                | 0 | 6 | inf | 0.7281 |
| hsa-miR-1249-3p                | 0 | 6 | inf | 0.7281 |
| hsa-miR-1301-3p                | 0 | 6 | inf | 0.7281 |
| hsa-miR-1304-3p_1ss13CA        | 0 | 6 | inf | 0.7281 |
| hsa-miR-2682-3p_L+1R-1_1ss22CT | 0 | 6 | inf | 0.7281 |
| hsa-miR-3605-3p                | 0 | 6 | inf | 0.7281 |
| hsa-miR-4725-3p_R+1            | 0 | 6 | inf | 0.7281 |
| hsa-miR-9901_L+4R-2            | 0 | 6 | inf | 0.7281 |
| ggo-mir-1291-p3                | 0 | 6 | inf | 0.7281 |
| mmu-mir-3535-p3                | 0 | 6 | inf | 0.7281 |
| mmu-mir-6240-p5_1ss1GA         | 0 | 6 | inf | 0.7281 |
| bta-miR-296-3p_L-1R+1          | 0 | 6 | inf | 0.7281 |
| PC-3p-17170_26                 | 0 | 6 | inf | 0.7281 |
| PC-3p-33154_11                 | 0 | 6 | inf | 0.7281 |
| PC-5p-28757_13                 | 0 | 6 | inf | 0.7281 |
| hsa-miR-34c-3p                 | 0 | 4 | inf | 0.5081 |
| hsa-miR-151b_R+2               | 0 | 4 | inf | 0.5081 |
| hsa-miR-181c-5p_R+1            | 0 | 4 | inf | 0.5081 |
| hsa-miR-217-5p                 | 0 | 4 | inf | 0.5081 |
| hsa-miR-494-5p_R-1             | 0 | 4 | inf | 0.5081 |
| hsa-miR-1226-3p                | 0 | 4 | inf | 0.5081 |
| hsa-miR-1290_1ss13TG           | 0 | 4 | inf | 0.5081 |
| hsa-miR-3940-3p                | 0 | 4 | inf | 0.5081 |
| hsa-mir-5684-p3_1ss19CG        | 0 | 4 | inf | 0.5081 |
| hsa-miR-6511b-3p_R+1           | 0 | 4 | inf | 0.5081 |
| hsa-mir-8086-p3_1ss19AG        | 0 | 4 | inf | 0.5081 |
| hsa-miR-10527-5p_R-1           | 0 | 4 | inf | 0.5081 |
| ptr-mir-4743-p3_1ss23GT        | 0 | 4 | inf | 0.5081 |
| cgr-mir-1260-p3_1ss1AG         | 0 | 4 | inf | 0.5081 |
| mmu-mir-6236-p3_1ss1CG         | 0 | 4 | inf | 0.5081 |
| bta-miR-7857-3p_R-1            | 0 | 4 | inf | 0.5081 |
| PC-3p-33979_10                 | 0 | 4 | inf | 0.5081 |
| PC-3p-33419_10                 | 0 | 4 | inf | 0.5081 |
| hsa-let-7a-2-3p                | 0 | 4 | inf | 0.5081 |
| hsa-miR-136-5p_R-1             | 0 | 4 | inf | 0.5081 |
| hsa-miR-421                    | 0 | 4 | inf | 0.5081 |
| hsa-miR-452-5p_R+1             | 0 | 4 | inf | 0.5081 |
| hsa-miR-501-5p_R+2             | 0 | 4 | inf | 0.5081 |
| hsa-miR-664b-3p                | 0 | 4 | inf | 0.5081 |
| hsa-miR-942-5p_R+1             | 0 | 4 | inf | 0.5081 |
| hsa-mir-1285-1-p3_1ss19TC      | 0 | 4 | inf | 0.5081 |
| hsa-miR-2355-3p_L-2R+1         | 0 | 4 | inf | 0.5081 |
| hsa-miR-3154                   | 0 | 4 | inf | 0.5081 |
| eca-miR-9182_L-1R+2            | 0 | 4 | inf | 0.5081 |
| oan-miR-1386                   | 0 | 4 | inf | 0.5081 |
| pal-miR-9993b-3p               | 0 | 4 | inf | 0.5081 |
| oan-miR-458-3p                 | 0 | 4 | inf | 0.5081 |
| PC-3p-37780_9                  | 0 | 4 | inf | 0.5081 |
| PC-5p-35952_9                  | 0 | 4 | inf | 0.5081 |

# SUPPLEMENTARY DATA

|                               |   |   |     |        |
|-------------------------------|---|---|-----|--------|
| PC-3p-35644_9                 | 0 | 4 | inf | 0.5081 |
| PC-3p-35774_9                 | 0 | 4 | inf | 0.5081 |
| PC-3p-36658_9                 | 0 | 4 | inf | 0.5081 |
| PC-5p-36216_9                 | 0 | 4 | inf | 0.5081 |
| PC-3p-36756_9                 | 0 | 4 | inf | 0.5081 |
| PC-5p-36968_9                 | 0 | 4 | inf | 0.5081 |
| hsa-miR-23b-5p                | 0 | 3 | inf | 0.2552 |
| hsa-miR-96-5p                 | 0 | 3 | inf | 0.2552 |
| hsa-miR-98-3p_L-1R+1_1ss22CT  | 0 | 3 | inf | 0.2552 |
| hsa-miR-200c-3p               | 0 | 3 | inf | 0.2552 |
| hsa-miR-212-5p                | 0 | 3 | inf | 0.2552 |
| hsa-miR-378a-5p               | 0 | 3 | inf | 0.2552 |
| hsa-miR-487a-3p               | 0 | 3 | inf | 0.2552 |
| hsa-miR-541-5p_R-4            | 0 | 3 | inf | 0.2552 |
| hsa-miR-770-5p_R-1            | 0 | 3 | inf | 0.2552 |
| hsa-miR-1180-5p_R-1           | 0 | 3 | inf | 0.2552 |
| hsa-miR-1229-3p               | 0 | 3 | inf | 0.2552 |
| hsa-miR-1234-3p_R+1           | 0 | 3 | inf | 0.2552 |
| hsa-miR-1306-3p_L+1R+3        | 0 | 3 | inf | 0.2552 |
| hsa-miR-10400-5p_R-3_1ss12GA  | 0 | 3 | inf | 0.2552 |
| eca-miR-8986a_L-1R-1          | 0 | 3 | inf | 0.2552 |
| ssc-miR-30a-3p_L-1R+1         | 0 | 3 | inf | 0.2552 |
| oan-miR-1388-3p               | 0 | 3 | inf | 0.2552 |
| PC-3p-41871_8                 | 0 | 3 | inf | 0.2552 |
| PC-3p-42880_8                 | 0 | 3 | inf | 0.2552 |
| PC-3p-39587_8                 | 0 | 3 | inf | 0.2552 |
| PC-3p-39792_8                 | 0 | 3 | inf | 0.2552 |
| PC-3p-39271_8                 | 0 | 3 | inf | 0.2552 |
| PC-5p-40074_8                 | 0 | 3 | inf | 0.2552 |
| hsa-miR-7-5p                  | 0 | 3 | inf | 0.2552 |
| hsa-miR-25-5p_R+2             | 0 | 3 | inf | 0.2552 |
| hsa-miR-30c-2-3p              | 0 | 3 | inf | 0.2552 |
| hsa-miR-103a-2-5p_R-1         | 0 | 3 | inf | 0.2552 |
| hsa-miR-146b-3p_L+1R-1        | 0 | 3 | inf | 0.2552 |
| hsa-miR-152-5p                | 0 | 3 | inf | 0.2552 |
| hsa-miR-181d-5p_R+1           | 0 | 3 | inf | 0.2552 |
| hsa-miR-181a-3p               | 0 | 3 | inf | 0.2552 |
| hsa-miR-202-5p_R-1            | 0 | 3 | inf | 0.2552 |
| hsa-miR-204-5p                | 0 | 3 | inf | 0.2552 |
| hsa-miR-212-3p                | 0 | 3 | inf | 0.2552 |
| hsa-miR-215-5p_1ss20AC        | 0 | 3 | inf | 0.2552 |
| hsa-miR-219a-5p               | 0 | 3 | inf | 0.2552 |
| hsa-miR-299-5p_R-1            | 0 | 3 | inf | 0.2552 |
| hsa-miR-375-3p                | 0 | 3 | inf | 0.2552 |
| hsa-miR-455-5p                | 0 | 3 | inf | 0.2552 |
| hsa-miR-483-5p                | 0 | 3 | inf | 0.2552 |
| mmu-miR-496a-5p_L-1R+2_1ss7CT | 0 | 3 | inf | 0.2552 |
| hsa-miR-506-3p_L+1            | 0 | 3 | inf | 0.2552 |
| hsa-miR-589-3p_1ss24AC        | 0 | 3 | inf | 0.2552 |
| hsa-miR-625-3p                | 0 | 3 | inf | 0.2552 |
| hsa-miR-769-3p_R-1            | 0 | 3 | inf | 0.2552 |
| hsa-miR-1197                  | 0 | 3 | inf | 0.2552 |
| hsa-miR-1269a                 | 0 | 3 | inf | 0.2552 |
| hsa-mir-1292-p5               | 0 | 3 | inf | 0.2552 |
| hsa-miR-1908-5p               | 0 | 3 | inf | 0.2552 |
| hsa-miR-1910-5p_R+1           | 0 | 3 | inf | 0.2552 |
| hsa-miR-3127-3p_R-1           | 0 | 3 | inf | 0.2552 |
| hsa-mir-3135b-p3_1ss3AG       | 0 | 3 | inf | 0.2552 |
| hsa-miR-3195_L+3R-1           | 0 | 3 | inf | 0.2552 |

# SUPPLEMENTARY DATA

|                             |   |   |     |        |
|-----------------------------|---|---|-----|--------|
| hsa-miR-3661                | 0 | 3 | inf | 0.2552 |
| hsa-miR-3934-5p_R-2         | 0 | 3 | inf | 0.2552 |
| hsa-miR-4454_1ss2GA         | 0 | 3 | inf | 0.2552 |
| hsa-mir-6132-p3             | 0 | 3 | inf | 0.2552 |
| hsa-miR-6735-5p_R-2         | 0 | 3 | inf | 0.2552 |
| hsa-miR-6858-3p             | 0 | 3 | inf | 0.2552 |
| hsa-miR-6881-5p             | 0 | 3 | inf | 0.2552 |
| hsa-miR-6882-3p_R-2_1ss22CT | 0 | 3 | inf | 0.2552 |
| mmu-miR-1839-5p             | 0 | 3 | inf | 0.2552 |
| cfa-mir-8903-p3_1ss9AG      | 0 | 3 | inf | 0.2552 |
| oan-miR-27b-3p_R+1          | 0 | 3 | inf | 0.2552 |
| mdo-miR-210-3p_L-1R+1       | 0 | 3 | inf | 0.2552 |
| bta-mir-1246-p3_1ss17AG     | 0 | 3 | inf | 0.2552 |
| mmu-mir-3535-p5             | 0 | 3 | inf | 0.2552 |
| oan-miR-15c-5p_R+1_1ss1TC   | 0 | 3 | inf | 0.2552 |
| eca-miR-451_R-1_1ss21TG     | 0 | 3 | inf | 0.2552 |
| mmu-miR-5099_L+2R-1         | 0 | 3 | inf | 0.2552 |
| PC-5p-44344_7               | 0 | 3 | inf | 0.2552 |
| PC-5p-44472_7               | 0 | 3 | inf | 0.2552 |
| PC-3p-23151_18              | 0 | 3 | inf | 0.2552 |
| PC-5p-48417_7               | 0 | 3 | inf | 0.2552 |
| PC-5p-47000_7               | 0 | 3 | inf | 0.2552 |
| PC-3p-48386_7               | 0 | 3 | inf | 0.2552 |
| PC-5p-27475_14              | 0 | 3 | inf | 0.2552 |
| PC-3p-47110_7               | 0 | 3 | inf | 0.2552 |
| hsa-miR-7-1-3p_L-1R+1       | 0 | 2 | inf | 0.0000 |
| hsa-miR-29c-3p_R-1          | 0 | 2 | inf | 0.0000 |
| hsa-miR-124-3p_R-1          | 0 | 2 | inf | 0.0000 |
| hsa-miR-191-3p_L-1_1ss19CT  | 0 | 2 | inf | 0.0000 |
| hsa-miR-216a-5p             | 0 | 2 | inf | 0.0000 |
| hsa-miR-378c_R-5            | 0 | 2 | inf | 0.0000 |
| hsa-miR-495-3p              | 0 | 2 | inf | 0.0000 |
| hsa-miR-497-5p_R+1          | 0 | 2 | inf | 0.0000 |
| hsa-miR-509-3p_R+1          | 0 | 2 | inf | 0.0000 |
| rno-miR-544-5p_L+1          | 0 | 2 | inf | 0.0000 |
| hsa-miR-548aq-3p_R-1        | 0 | 1 | inf | 0.0000 |
| hsa-miR-550a-3p_L-1R+1      | 0 | 2 | inf | 0.0000 |
| hsa-miR-550a-5p_R-2         | 0 | 1 | inf | 0.0000 |
| hsa-miR-561-5p              | 0 | 2 | inf | 0.0000 |
| hsa-miR-584-5p_R-1          | 0 | 2 | inf | 0.0000 |
| hsa-miR-660-5p_R+1          | 0 | 2 | inf | 0.0000 |
| hsa-miR-675-5p_R-1          | 0 | 2 | inf | 0.0000 |
| hsa-miR-1185-5p             | 0 | 2 | inf | 0.0000 |
| hsa-miR-1268b_R-2           | 0 | 2 | inf | 0.0000 |
| hsa-miR-1268a               | 0 | 2 | inf | 0.0000 |
| hsa-miR-1843_R+2            | 0 | 2 | inf | 0.0000 |
| hsa-mir-2110-p3             | 0 | 2 | inf | 0.0000 |
| hsa-miR-3124-5p_R+1         | 0 | 2 | inf | 0.0000 |
| hsa-mir-3155a-p5_1ss23AT    | 0 | 2 | inf | 0.0000 |
| hsa-miR-3158-3p             | 0 | 1 | inf | 0.0000 |
| hsa-miR-3177-3p             | 0 | 2 | inf | 0.0000 |
| hsa-mir-3648-1-p5           | 0 | 2 | inf | 0.0000 |
| hsa-miR-3651                | 0 | 2 | inf | 0.0000 |
| hsa-mir-3909-p5_1ss21GT     | 0 | 2 | inf | 0.0000 |
| hsa-miR-3944-3p             | 0 | 2 | inf | 0.0000 |
| hsa-miR-4254_R-1            | 0 | 2 | inf | 0.0000 |
| hsa-miR-4449_R+1            | 0 | 2 | inf | 0.0000 |
| hsa-mir-4477b-p5_1ss9GA     | 0 | 2 | inf | 0.0000 |
| hsa-mir-4477a-p5_1ss11CG    | 0 | 2 | inf | 0.0000 |

## SUPPLEMENTARY DATA

|                             |   |   |     |        |
|-----------------------------|---|---|-----|--------|
| hsa-miR-6785-5p_L+1R+1      | 0 | 2 | inf | 0.0000 |
| hsa-miR-7976_R+3            | 0 | 2 | inf | 0.0000 |
| pal-miR-9298-5p_R-5         | 0 | 2 | inf | 0.0000 |
| bta-miR-20b_R+1             | 0 | 1 | inf | 0.0000 |
| eca-mir-8986b-p5_1ss1CG     | 0 | 2 | inf | 0.0000 |
| ssc-miR-339_R+1             | 0 | 2 | inf | 0.0000 |
| bta-mir-1246-p5_1ss18AG     | 0 | 1 | inf | 0.0000 |
| mmu-miR-2137_R-1_1ss16AG    | 0 | 2 | inf | 0.0000 |
| mmu-miR-2137_L-2_1ss16AG    | 0 | 2 | inf | 0.0000 |
| bta-miR-20b_1ss19GA         | 0 | 2 | inf | 0.0000 |
| mdo-miR-210-3p_L-1R+2       | 0 | 2 | inf | 0.0000 |
| bta-miR-429                 | 0 | 2 | inf | 0.0000 |
| oan-miR-1388-5p             | 0 | 1 | inf | 0.0000 |
| bta-miR-1388-5p_R+1         | 0 | 1 | inf | 0.0000 |
| mmu-miR-8117_L-1R-1_1ss15GA | 0 | 2 | inf | 0.0000 |

**Supplementary Table 5.** KEGG pathway ranking summary of predicted targets the top 6 ranked miRNAs in EVs from early-passage iMSCs.

| TERM                                   | TOTAL GENES OF THE TERM | UNION TARGETS IN THE TERM | MIRS IN THE TERM | SCORE |
|----------------------------------------|-------------------------|---------------------------|------------------|-------|
| MAPK_SIGNALING_PATHWAY                 | 272                     | 80                        | 6                | 6.151 |
| TGF-BETA_SIGNALING_PATHWAY             | 84                      | 35                        | 6                | 5.35  |
| CYTOKINE-CYTOKINE_RECEPTOR_INTERACTION | 275                     | 53                        | 6                | 4.739 |
| PATHWAYS_IN_CANCER                     | 325                     | 92                        | 6                | 4.238 |
| REGULATION_OF_ACTIN_CYTOSKELETON       | 213                     | 64                        | 6                | 3.889 |
| P53_SIGNALING_PATHWAY                  | 68                      | 22                        | 6                | 3.683 |
| PANCREATIC_CANCER                      | 70                      | 23                        | 6                | 3.67  |
| CHAGAS_DISEASE                         | 104                     | 29                        | 6                | 3.519 |
| NEUROTROPHIN_SIGNALING_PATHWAY         | 127                     | 42                        | 6                | 3.486 |
| MELANOMA                               | 71                      | 24                        | 6                | 3.435 |
| AXON_GUIDANCE                          | 129                     | 49                        | 6                | 2.902 |
| SMALL_CELL_LUNG_CANCER                 | 84                      | 24                        | 6                | 2.888 |
| CHRONIC_MYELOID_LEUKEMIA               | 73                      | 21                        | 6                | 2.884 |
| GLIOMA                                 | 65                      | 23                        | 6                | 2.784 |
| COLORECTAL_CANCER                      | 62                      | 17                        | 6                | 2.699 |
| FOCAL_ADHESION                         | 199                     | 57                        | 6                | 2.681 |
| JAK-STAT_SIGNALING_PATHWAY             | 155                     | 29                        | 6                | 2.652 |
| PROSTATE_CANCER                        | 89                      | 26                        | 6                | 2.494 |
| ENDOCYTOSIS                            | 201                     | 56                        | 6                | 2.462 |
| APOPTOSIS                              | 88                      | 19                        | 6                | 2.438 |



## SUPPLEMENTARY DATA

|                                                        |     |    |   |       |
|--------------------------------------------------------|-----|----|---|-------|
| AMOEBIASIS                                             | 105 | 25 | 6 | 2.334 |
| CHEMOKINE SIGNALING PATHWAY                            | 189 | 36 | 6 | 2.31  |
| T_CELL_RECEPTOR_SIGNALING_PATHWAY                      | 108 | 36 | 6 | 2.154 |
| CELL_CYCLE                                             | 124 | 29 | 6 | 2.083 |
| PROTEIN_PROCESSING_IN_ENDOPLASMIC_RETICULUM            | 166 | 42 | 6 | 2.017 |
| TOXOPLASMOSES                                          | 132 | 24 | 6 | 1.992 |
| UBIQUITIN_MEDIATED_PROTEOLYSIS                         | 135 | 40 | 6 | 1.991 |
| ECM-RECEPTOR_INTERACTION                               | 84  | 28 | 6 | 1.99  |
| AMYOTROPHIC_LATERAL_SCLEROSIS_(ALS)                    | 54  | 18 | 6 | 1.954 |
| WNT_SIGNALING_PATHWAY                                  | 150 | 39 | 6 | 1.934 |
| GNRH_SIGNALING_PATHWAY                                 | 101 | 29 | 6 | 1.878 |
| ERBB_SIGNALING_PATHWAY                                 | 87  | 31 | 6 | 1.863 |
| LONG-TERM_POTENTIATION                                 | 70  | 24 | 6 | 1.859 |
| BLADDER_CANCER                                         | 42  | 15 | 6 | 1.815 |
| NON-SMALL_CELL_LUNG_CANCER                             | 54  | 17 | 6 | 1.684 |
| MALARIA                                                | 51  | 10 | 4 | 1.673 |
| DILATED_CARDIOMYOPATHY                                 | 90  | 27 | 6 | 1.612 |
| FC_GAMMA_R-MEDIATED_PHAGOCYTOSIS                       | 94  | 28 | 6 | 1.606 |
| OOCYTE_MEIOSIS                                         | 112 | 35 | 6 | 1.57  |
| HYPERTROPHIC_CARDIOMYOPATHY_(HCM)                      | 87  | 24 | 6 | 1.532 |
| TOLL-LIKE RECEPTOR SIGNALING PATHWAY                   | 102 | 19 | 6 | 1.513 |
| INSULIN_SIGNALING_PATHWAY                              | 137 | 35 | 6 | 1.497 |
| CALCIUM SIGNALING PATHWAY                              | 177 | 43 | 6 | 1.47  |
| PROGESTERONE-MEDIATED OOCYTE MATURATION                | 86  | 23 | 6 | 1.381 |
| VASCULAR_SMOOTH_MUSCLE_CONTRACTION                     | 126 | 28 | 6 | 1.377 |
| SHIGELLOSIS                                            | 61  | 13 | 6 | 1.363 |
| VEGF_SIGNALING_PATHWAY                                 | 76  | 20 | 6 | 1.341 |
| LEISHMANIASIS                                          | 72  | 15 | 6 | 1.321 |
| ADHERENS_JUNCTION                                      | 73  | 22 | 6 | 1.295 |
| ARRHYTHMOGENIC_RIGHT_VENTRICULAR_CARDIOMYOPATHY_(ARVC) | 74  | 19 | 6 | 1.29  |
| B_CELL_RECEPTOR_SIGNALING_PATHWAY                      | 75  | 16 | 5 | 1.287 |
| PROTEIN_DIGESTION_AND_ABSORPTION                       | 80  | 17 | 6 | 1.287 |

## SUPPLEMENTARY DATA

|                                                            |     |    |   |       |
|------------------------------------------------------------|-----|----|---|-------|
| TYPE_I_DIABETES_MELLITUS                                   | 43  | 7  | 3 | 1.281 |
| HEPATITIS_C                                                | 134 | 27 | 6 | 1.255 |
| FC_EPSILON_RI_SIGNALING_PATHWAY                            | 79  | 21 | 6 | 1.247 |
| NATURAL_KILLER_CELL_MEDIATED_CYTO_TOXICITY                 | 140 | 21 | 5 | 1.226 |
| PHOSPHATIDYLINOSITOL_SIGNALING_SYSTEM                      | 78  | 18 | 6 | 1.208 |
| MELANOGENESIS                                              | 101 | 27 | 6 | 1.2   |
| ADIPOCYTOKINE_SIGNALING_PATHWAY                            | 68  | 13 | 5 | 1.175 |
| NOTCH_SIGNALING_PATHWAY                                    | 47  | 16 | 6 | 1.137 |
| GALACTOSE_METABOLISM                                       | 26  | 5  | 3 | 1.132 |
| PRION_DISEASES                                             | 36  | 10 | 6 | 1.099 |
| RENAL_CELL_CARCINOMA                                       | 70  | 21 | 6 | 1.056 |
| CELL_ADHESION_MOLECULES_(CAMs)                             | 133 | 27 | 6 | 1.047 |
| GAP_JUNCTION                                               | 90  | 23 | 6 | 1.043 |
| TIGHT_JUNCTION                                             | 132 | 25 | 6 | 1.018 |
| TYPE_II_DIABETES_MELLITUS                                  | 47  | 12 | 6 | 1.018 |
| ALZHEIMER'S_DISEASE                                        | 168 | 27 | 6 | 1.013 |
| GASTRIC ACID SECRETION                                     | 74  | 22 | 6 | 1.01  |
| MTOR SIGNALING PATHWAY                                     | 52  | 18 | 6 | 1.01  |
| ALLOGRAFT_REJECTION                                        | 37  | 6  | 3 | 0.976 |
| NOD-LIKE RECEPTOR SIGNALING PATHWAY                        | 62  | 9  | 5 | 0.96  |
| BACTERIAL_INVASION_OF_EPITHELIAL_CELLS                     | 70  | 17 | 4 | 0.942 |
| ALDOSTERONE-REGULATED SODIUM REABSORPTION                  | 42  | 17 | 6 | 0.94  |
| ENDOMETRIAL_CANCER                                         | 52  | 13 | 6 | 0.929 |
| NEUROACTIVE_LIGAND-RECEPTOR INTERACTION                    | 318 | 45 | 6 | 0.922 |
| RIG-I-LIKE RECEPTOR SIGNALING PATHWAY                      | 71  | 12 | 6 | 0.907 |
| INOSITOL_PHOSPHATE_METABOLISM                              | 57  | 11 | 5 | 0.898 |
| GRAFT-VERSUS-HOST_DISEASE                                  | 41  | 5  | 3 | 0.894 |
| EPITHELIAL_CELL_SIGNALING_IN_HELICOBACTER PYLORI INFECTION | 68  | 16 | 6 | 0.874 |
| VASOPRESSIN-REGULATED WATER REABSORPTION                   | 44  | 12 | 6 | 0.872 |
| LONG-TERM_DEPRESSION                                       | 70  | 17 | 6 | 0.865 |
| PHAGOSOME                                                  | 154 | 21 | 6 | 0.864 |
| SPLICEOSOME                                                | 127 | 15 | 6 | 0.853 |

## SUPPLEMENTARY DATA

|                                              |     |    |   |       |
|----------------------------------------------|-----|----|---|-------|
| RNA_TRANSPORT                                | 144 | 27 | 6 | 0.845 |
| PURINE_METABOLISM                            | 161 | 15 | 6 | 0.816 |
| CYSTEINE_AND_METHIONINE_METABOLISM           | 36  | 6  | 6 | 0.799 |
| OLFACTORY_TRANSDUCTION                       | 388 | 7  | 3 | 0.779 |
| HUNTINGTON'S_DISEASE                         | 183 | 24 | 6 | 0.76  |
| ACUTE_MYELOID_LEUKEMIA                       | 57  | 12 | 6 | 0.742 |
| LEUKOCYTE_TRANSENDOTHELIAL_MIGRATION         | 116 | 19 | 6 | 0.733 |
| SALIVARY_SECRETION                           | 89  | 21 | 6 | 0.729 |
| HEMATOPOIETIC_CELL_LINEAGE                   | 88  | 15 | 6 | 0.721 |
| PANCREATIC_SECRETION                         | 103 | 19 | 6 | 0.715 |
| RNA_DEGRADATION                              | 57  | 12 | 5 | 0.683 |
| STARCH_AND_SUCROSE_METABOLISM                | 53  | 8  | 5 | 0.683 |
| THYROID_CANCER                               | 29  | 10 | 5 | 0.664 |
| LYSINE_DEGRADATION                           | 44  | 9  | 6 | 0.626 |
| PARKINSON'S_DISEASE                          | 130 | 9  | 5 | 0.622 |
| PENTOSE_PHOSPHATE_PATHWAY                    | 26  | 2  | 1 | 0.62  |
| HOMOLOGOUS_RECOMBINATION                     | 28  | 2  | 1 | 0.594 |
| AUTOIMMUNE_THYROID_DISEASE                   | 52  | 5  | 4 | 0.56  |
| CARDIAC_MUSCLE_CONTRACTION                   | 77  | 14 | 6 | 0.557 |
| GLYCOLYSIS_GLUCONEOGENESIS                   | 65  | 5  | 4 | 0.554 |
| SYSTEMIC_LUPUS_ERYTHEMATOSUS                 | 136 | 11 | 4 | 0.554 |
| VIRAL_MYOCARDITIS                            | 70  | 9  | 6 | 0.522 |
| O-GLYCAN_BIOSYNTHESIS                        | 30  | 7  | 4 | 0.512 |
| PPAR_SIGNALING_PATHWAY                       | 70  | 10 | 5 | 0.499 |
| ABC_TRANSPORTERS                             | 44  | 7  | 6 | 0.49  |
| COMPLEMENT_AND_COAGULATION_CASCADES          | 69  | 8  | 6 | 0.487 |
| ALANINE_ASPARTATE_AND_Glutamate_METABOLISM   | 32  | 5  | 5 | 0.481 |
| BASAL_CELL_CARCINOMA                         | 55  | 13 | 5 | 0.474 |
| AMINO_SUGAR_AND_NUCLEOTIDE_SUGAR_METABOLISM  | 47  | 6  | 5 | 0.449 |
| INTESTINAL_IMMUNE_NETWORK_FOR_IGA_PRODUCTION | 48  | 8  | 4 | 0.443 |
| PRIMARY_IMMUNODEFICIENCY                     | 35  | 7  | 5 | 0.437 |
| GLYCEROPHOSPHOLIPID_METABOLISM               | 79  | 14 | 4 | 0.431 |

## SUPPLEMENTARY DATA

|                                                          |     |    |   |       |
|----------------------------------------------------------|-----|----|---|-------|
| CARBOHYDRATE_DIGESTION_AND_ABSORPTION                    | 43  | 5  | 5 | 0.427 |
| OXIDATIVE_PHOSPHORYLATION                                | 132 | 7  | 5 | 0.425 |
| BASAL_TRANSCRIPTION_FACTORS                              | 35  | 5  | 4 | 0.417 |
| RETINOL_METABOLISM                                       | 65  | 6  | 4 | 0.417 |
| LYSOSOME                                                 | 121 | 16 | 5 | 0.408 |
| VALINE_LEUCINE_AND_ISOLEUCINE_DEGRADATION                | 44  | 5  | 5 | 0.407 |
| PEROXISOME                                               | 79  | 7  | 3 | 0.401 |
| N-GLYCAN_BIOSYNTHESIS                                    | 49  | 11 | 3 | 0.398 |
| PATHOGENIC_ESCHERICHIA_COLI_INFECTION                    | 56  | 7  | 4 | 0.384 |
| STAPHYLOCOCCUS_AUREUS_INFECTION                          | 55  | 4  | 4 | 0.381 |
| VIBRIO_CHOLERAЕ_INFECTION                                | 54  | 10 | 4 | 0.361 |
| SNARE_INTERACTIONS_IN_VESICULAR_TRANSPORT                | 36  | 8  | 3 | 0.349 |
| CYTOSOLIC_DNA-SENSING_PATHWAY                            | 56  | 3  | 3 | 0.34  |
| NUCLEOTIDE_EXCISION_REPAIR                               | 44  | 3  | 3 | 0.334 |
| SPHINGOLIPID_METABOLISM                                  | 40  | 9  | 4 | 0.331 |
| TYROSINE_METABOLISM                                      | 41  | 3  | 2 | 0.329 |
| BUTANOATE_METABOLISM                                     | 30  | 2  | 2 | 0.312 |
| DNA_REPLICATION                                          | 36  | 3  | 2 | 0.307 |
| HEDGEHOG_SIGNALING_PATHWAY                               | 56  | 10 | 4 | 0.303 |
| GLYCOSPHINGOLIPID_BIOSYNTHESIS_LACTO AND NEOLACTO SERIES | 26  | 6  | 4 | 0.302 |
| STEROID_HORMONE_BIOSYNTHESIS                             | 56  | 7  | 3 | 0.287 |
| FRUCTOSE_AND_MANNOSE_METABOLISM                          | 34  | 2  | 2 | 0.279 |
| GLYCEROLIPID_METABOLISM                                  | 49  | 7  | 3 | 0.268 |
| METABOLISM_OF_XENOBIOTICS_BY_CYTOCHROME_P450             | 71  | 6  | 3 | 0.265 |
| PROPANOATE_METABOLISM                                    | 32  | 1  | 1 | 0.256 |
| ANTIGEN_PROCESSING_AND_PRESENTATION                      | 76  | 8  | 4 | 0.229 |
| SELENOAMINO_ACID_METABOLISM                              | 26  | 4  | 4 | 0.217 |
| REGULATION_OF_AUTOPHAGY                                  | 34  | 5  | 4 | 0.211 |
| PROTEASOME                                               | 44  | 6  | 4 | 0.21  |
| COLLECTING_DUCT_ACID_SECRETION                           | 27  | 3  | 3 | 0.169 |
| ARGININE_AND_PROLINE_METABOLISM                          | 54  | 4  | 3 | 0.164 |

## SUPPLEMENTARY DATA

|                                                       |    |   |   |       |
|-------------------------------------------------------|----|---|---|-------|
| TASTE_TRANSDUCTION                                    | 52 | 4 | 3 | 0.162 |
| CITRATE_CYCLE (TCA_CYCLE)                             | 31 | 4 | 3 | 0.16  |
| TRYPTOPHAN_METABOLISM                                 | 42 | 3 | 3 | 0.153 |
| PHOTOTRANSDUCTION                                     | 29 | 2 | 3 | 0.147 |
| ETHER_LIPID_METABOLISM                                | 35 | 3 | 3 | 0.146 |
| PENTOSE_AND_GLUCURONATE_INTERCONVERSIONS              | 31 | 4 | 2 | 0.144 |
| ARACHIDONIC_ACID_METABOLISM                           | 57 | 4 | 3 | 0.143 |
| PYRIMIDINE_METABOLISM                                 | 99 | 2 | 2 | 0.137 |
| DRUG_METABOLISM_OTHER_ENZYMES                         | 52 | 4 | 2 | 0.136 |
| ASCORBATE_AND_ALDARATE_METABOLISM                     | 26 | 3 | 1 | 0.13  |
| GLUTATHIONE_METABOLISM                                | 50 | 5 | 3 | 0.126 |
| PYRUVATE_METABOLISM                                   | 41 | 2 | 2 | 0.121 |
| GLYCOSYLPHOSPHATIDYLINOSITOL(GPI)-ANCHOR BIOSYNTHESIS | 25 | 1 | 2 | 0.12  |
| ASTHMA                                                | 30 | 3 | 3 | 0.117 |
| MATURITY_ONSET_DIABETES_OF_THE_YOUNG                  | 25 | 3 | 2 | 0.101 |
| PORPHYRIN_AND_CHLOROPHYLL_METABOLISM                  | 43 | 3 | 1 | 0.09  |
| DRUG_METABOLISM_CYTOCHROME_P450                       | 73 | 4 | 1 | 0.087 |
| HISTIDINE_METABOLISM                                  | 29 | 2 | 1 | 0.071 |
| GLYCINE_SERINE_AND_THREONINE_METABOLISM               | 32 | 1 | 1 | 0.066 |
| GLYCOSAMINOGLYCAN_BIOSYNTHESIS_HEPARAN_SULFATE        | 26 | 2 | 1 | 0.056 |
| AMINOACYL-TRNA_BIOSYNTHESIS                           | 63 | 1 | 1 | 0.046 |
| BASE_EXCISION_REPAIR                                  | 33 | 1 | 1 | 0.037 |
| FATTY_ACID_METABOLISM                                 | 43 | 1 | 1 | 0.031 |
